# Supplementary material for: Hypertrophic cardiomyopathy mutations in the pliant and light chain-binding regions of the lever arm of human β-cardiac myosin have divergent effects on myosin function
Source: eLife. 2022 Jun 29;11:e76805. doi: 10.7554/eLife.76805 (PMC9242648; doi:10.7554/eLife.76805)
Supplement: Figure 2—source data 2. — (2B) Ratio of pixel density of ELC/RLC over WT 2-hep myosin heavy chain, based on fluorescent imaging of Coomassie stained gels. (2 C) Ratio of LC/HC for mutants over same-day WT LC/HC controls. [file elife-76805-fig2-data2.xlsx]

## Sheet: Fig. 2 LC loading
	Fig. 2B: LC/HC Ratios for WT 2-hep				Fig. 2C: LC/HC ratios for mutant 2-heps normalized to same-day WT
	ELC/HC ratio	RLC/HC ratio				ELC				RLC
	0.177604	0.104232			D778V	1.20582	1.04979	1.17733		1.58429	1.16744	1.14708
	0.203082	0.120989			L781P	1.04797	0.844537	1.08662	0.974235	1.27682	1.10145	1.3362	1.31746
	0.210678	0.119216			S782N	0.976473	0.937903	1.5419		1.10508	0.99375	1.49598
	0.203779	0.136641			A797T	1.0841	1.06638	0.768656		1.16964	1.06151	0.711387
	0.168044	0.062673			F834L	1.28664	0.724305	1.0776		1.46883	0.709487	1.02336
	0.194619	0.114665
	0.208352	0.100972
	0.175339	0.10341
	0.186493	0.11813
