# Supplementary material for: Hypertrophic cardiomyopathy mutations in the pliant and light chain-binding regions of the lever arm of human β-cardiac myosin have divergent effects on myosin function
Source: eLife. 2022 Jun 29;11:e76805. doi: 10.7554/eLife.76805 (PMC9242648; doi:10.7554/eLife.76805)
Supplement: Figure 3—figure supplement 1—source data 1. — Raw rates are depicted in the left-hand boxes, rates of mutant 2-hep normalized to WT 2-hep control are shown in the middle boxes, and rates of mutant 25-hep normalized to mutant 2-hep are shown in the right-hand side boxes. For the five WT 2-hep/25-hep biological replicates, the raw rates are shown. Data shown is for all technical replicates of all biological replicates. [file elife-76805-fig3-figsupp1-data1.xlsx]

## Sheet: Fig. 3-figure supplement 1
	D778V Biological Replicate 1
	Raw rates (Fig. S2A)											Normalized to WT 2-hep								Normalized to Mut. 2-hep
	[actin], uM	WT 2-hep			D778V 2-hep			D778V 25-hep				[actin], uM	WT 2-hep			D778V 2-hep				[actin], uM	D778V 2-hep			D778V 25-hep
	0	0.0492823	0.0484211	0.0500718	0.0773445	0.0705502	0.0684928	0.0588517	0.0365072	0.0394498		0	0.00713719	0.00701246	0.00725152	0.0112012	0.0102173	0.00991931		0	0.0112012	0.0102173	0.00991931	0.00852305	0.00528706	0.00571322
	75	6.56459	6.52632	7.14115	7.77033	7.77512		5.94258	5.99522	2.92823		75	0.950701	0.945158	1.0342	1.12532	1.12601			75	1.12532	1.12601		0.86062	0.868243	0.424074
	5	1.78062	1.81699	1.49163	2.37967	2.02727	2.25789	1.19976	1.04952	1.1933		5	0.257874	0.263141	0.216021	0.344629	0.293595	0.326994		5	0.344629	0.293595	0.326994	0.173752	0.151994	0.172817
	35	4.66029	5.06699	4.14354	6.30861	5.19856	5.73684	2.64115	4.22249	3.83971		35	0.674915	0.733814	0.600078	0.91363	0.75287	0.830824		35	0.91363	0.75287	0.830824	0.382498	0.611512	0.556077
	2.5	1.50502	1.25622	1.00096	1.08636	1.25789	0.853349	0.712919	0.72823	0.918421		2.5	0.217961	0.181929	0.144961	0.15733	0.182172	0.123584		2.5	0.15733	0.182172	0.123584	0.103247	0.105464	0.133008
	55	4.89952	5.03589	4.2488	6.29904	5.96172	5.86842	4.31579	3.8445	4.47608		55	0.709561	0.72931	0.615323	0.912244	0.863392	0.84988		55	0.912244	0.863392	0.84988	0.625024	0.55677	0.648237
	20	4.0933	4.27273	3.88038	4.35646	4.7799	4.74402	2.46172	2.55024	2.45455		20	0.592803	0.618787	0.561967	0.630914	0.692238	0.687041		20	0.630914	0.692238	0.687041	0.356513	0.369332	0.355474
	10	3.5622	2.76794	3.59809	3.87799	3.90191	4.58134	2.07225	1.74737	1.87584		10	0.515887	0.400861	0.521084	0.561621	0.565085	0.663481		10	0.561621	0.565085	0.663481	0.300108	0.253058	0.271664
	D778V Biological Replicate 2
	Raw rates (Fig. S2B)											Normalized to WT 2-hep (Fig. 2A)								Normalized to Mut. 2-hep (Fig. 5B)
	[actin], uM	WT 2-hep			D778V 2-hep			D778V 25-hep				[actin], uM	WT 2-hep			D778V 2-hep				[actin], uM	D778V 2-hep			D778V 25-hep
	0	0.0447246	0.0445532	0.0425214	0.0409547	0.0419094	0.0414443	0.0266585	0.0274174	0.0292779		0	0.00696971	0.006943	0.00662637	0.00638222	0.006531	0.00645852		0	0.00554942	0.00567878	0.00561576	0.00361226	0.00371509	0.00396719
	75	6.51652	6.31824		7.5202	6.70257	6.93023	4.15912	4.85679	4.02203		75	1.01551	0.984609		1.17192	1.0445	1.07998		75	1.019	0.908207	0.939056	0.563566	0.658102	0.544991
	5	2.42081	2.4896	2.46022	2.53366	2.65851	2.612	1.09425	1.12656	0.989474		5	0.377249	0.387969	0.383391	0.394836	0.414291	0.407043		5	0.343314	0.360231	0.353929	0.148272	0.15265	0.134075
	35	4.96206	4.87148	5.07466	5.93635	5.76744	6.08813	2.5459	2.76132	3.06242		35	0.773267	0.759152	0.790816	0.925098	0.898775	0.94875		35	0.804384	0.781496	0.824949	0.344973	0.374163	0.414963
	2.5	1.74492	1.82032	1.92142	1.96524	2.31138	1.95814	0.828641	0.795349	0.870257		2.5	0.271922	0.283671	0.299426	0.306255	0.360197	0.305149		2.5	0.266293	0.313196	0.265331	0.112282	0.107771	0.117921
	55	5.41493	5.56671	5.11138	5.96818	5.6328	6.13953	3.5716	3.64749			55	0.843842	0.867494	0.796538	0.930057	0.877794	0.956761		55	0.808696	0.763252	0.831915	0.483957	0.49424
	20	4.25949	4.29131	4	4.56059	4.58017	4.22766	1.99192	2.00563	2.0776		20	0.663782	0.668741	0.623344	0.710704	0.713756	0.658822		20	0.617966	0.620619	0.572854	0.269908	0.271766	0.281518
	10	3.32681	3.16034	3.20685	3.66952	3.50306	3.75275	1.42228	1.4448	1.5339		10	0.518436	0.492495	0.499744	0.571844	0.545903	0.584814		10	0.497225	0.474669	0.508503	0.19272	0.195772	0.207846
	L781P Biological Replicate 1
	Raw rates (Fig. S2C)											Normalized to WT 2-hep								Normalized to Mut. 2-hep
	[actin], uM	WT 2-hep			L781P 2-hep			L781P 25-hep				[actin], uM	WT 2-hep			L781P 2-hep				[actin], uM	L781P 2-hep			L781P 25-hep
	0	0.1931	0.1707	0.12615	0.1731	0.04447	0.1176	0.1714	0.15135	0.142		0	0.0292089	0.0258206	0.0190818	0.0261836	0.00672667	0.0177885		0	0.0268539	0.00689885	0.0182439	0.0265901	0.0234797	0.0220292
	5		2.8075	3.01	3.5975	4.0025	3.605	1.292	1.10725	1.3875		5		0.424671	0.455302	0.544169	0.60543	0.545303		5	0.558098	0.620928	0.559262	0.200434	0.171773	0.21525
	10	4.2525	4.2825	4.0875	4.7725	4.385	3.81	2.3215	2.37575	2.041		10	0.643246	0.647784	0.618288	0.721903	0.663288	0.576312		10	0.740382	0.680267	0.591064	0.360146	0.368562	0.31663
	20	5.475	5.425	4.315	6.42	4.7975	4.5525	2.71	2.6525	2.3935		20	0.828165	0.820602	0.6527	0.971109	0.725684	0.688625		20	0.995966	0.74426	0.706252	0.420416	0.411496	0.371316
	35	3.9725	5.245		6.3775	4.9775	5.35	3.095	3.115	3.165		35	0.600892	0.793375		0.96468	0.752912	0.809257		35	0.989373	0.772184	0.829972	0.480143	0.483245	0.491002
	50	5.33	4.1675		3.9925	4.77	7.18	3.62	4.4175	3.1075		50	0.806232	0.630389		0.603918	0.721525	1.08607		50	0.619376	0.739994	1.11387	0.561589	0.685309	0.482082
	65	6.62	5.2125		6.4175	5.965	5.4025	4.19	3.9925	4.3825		65	1.00136	0.788459		0.970731	0.902284	0.817199		65	0.995579	0.92538	0.838117	0.650016	0.619376	0.679879
	80	6.6225	5.875	6.72	7.7675	6.0425	7.545	5.4275	5.6525	4.105		80	1.00174	0.88867	1.01649	1.17494	0.914007	1.14128		80	1.20501	0.937403	1.17049	0.841995	0.8769	0.636829
	L781P Biological Replicate 2
	Raw rates (Fig. S2D)											Normalized to WT 2-hep (Fig. 2B)								Normalized to Mut. 2-hep (Fig. 5C)
	[actin], uM	WT 2-hep			L781P 2-hep			L781P 25-hep				[actin], uM	WT 2-hep			L781P 2-hep				[actin], uM	L781P 2-hep			L781P 25-hep
	0	0.149842	0.156286	0.159507	0.117814	0.112192	0.135565	0.0862287	0.104485	0.112129		0	0.0309655	0.0322971	0.0329629	0.0243468	0.023185	0.0280152		0	0.025003	0.0238099	0.0287702	0.0182998	0.0221743	0.0237964
	80	4.8187	4.42198	4.56349	4.57865	4.73784	4.53316	3.26974	3.2091	3.3885		80	0.995805	0.913822	0.943064	0.946197	0.979095	0.936798		80	0.9717	1.00548	0.962047	0.693918	0.681048	0.719122
	5	1.75237	1.66646	1.75237	2.05407	1.99343	1.97498	0.985471	1.08427	0.995073		5	0.362135	0.34438	0.362135	0.424483	0.411951	0.408139		5	0.435924	0.423054	0.419139	0.209141	0.230108	0.211178
	40	3.33291	3.97726	3.87871	4.09097	3.87618	3.88882	2.67593	2.60265	2.78206		40	0.688761	0.821917	0.801552	0.845416	0.80103	0.803641		40	0.868202	0.82262	0.825301	0.567897	0.552346	0.59042
	2.5	1.31169	1.58307	1.6144	1.50954	1.45243	1.39987	0.777511	0.767151	0.777764		2.5	0.271066	0.327148	0.333623	0.311953	0.300151	0.28929		2.5	0.320361	0.308241	0.297087	0.165007	0.162808	0.16506
	60	4.36134	4.34365	4.13645	4.11623	4.24258	3.96968	3.15098	2.95389	2.9463		60	0.901289	0.897634	0.854815	0.850638	0.876747	0.820351		60	0.873564	0.900377	0.842461	0.668714	0.626886	0.625277
	25	3.60581	3.40114	3.44409	3.49716	3.36323	3.49463	2.24157	2.05357	2.188		25	0.745156	0.702859	0.711737	0.722702	0.695027	0.72218		25	0.742181	0.713759	0.741645	0.475714	0.435817	0.464346
	10	2.48541	2.38181	2.3439	2.61529	2.57233	2.51244	1.38168	1.44889	1.32836		10	0.51362	0.492211	0.484378	0.54046	0.531583	0.519207		10	0.555027	0.545911	0.533201	0.293226	0.30749	0.281911
	S782N Biological Replicate 1
	Raw rates (Fig. S2E)											Normalized to WT 2-hep								Normalized to Mut. 2-hep
	[Actin], uM	WT 2-hep			S782N 2-hep			S782N 25-hep				[Actin], uM	WT 2-hep			S782N 2-hep				[Actin], uM	S782N 2-hep			S782N 25-hep
	0	0.0836129	0.0940293	0.0835425	0.0946628	0.0824399	0.074651	0.039695	0.0436364	0.0389677		0	0.0172469	0.0193955	0.0172324	0.0195261	0.0170049	0.0153983		0	0.018734	0.016315	0.0147736	0.00785573	0.00863573	0.0077118
	2.5	2.44927	1.83953	2.08305	2.33619	2.45161	2.66041	1.06416	1.22651	1.09326		2.5	0.505212	0.379441	0.429672	0.481887	0.505696	0.548765		2.5	0.462337	0.48518	0.526501	0.2106	0.242729	0.216358
	5	3.18827	2.62053	3.03812			2.93959	1.34194	1.46674	1.26287		5	0.657646	0.540538	0.626676			0.606351		5			0.581751	0.265572	0.290272	0.249926
	10	3.79355	3.51672	3.6176	4.21818	3.86862	3.74428	1.80293	1.89114	1.94604		10	0.782498	0.725395	0.746204	0.870087	0.797983	0.772335		10	0.834788	0.765609	0.741002	0.356804	0.374262	0.385126
	20		4.12903	4.16891	4.28622	4.65924			2.87859	2.30029		20		0.851698	0.859925	0.884121	0.961064			20	0.848252	0.922074			0.56968	0.455233
	35	4.28856	3.28446	4.26041				1.89701	1.89419	2.59003		35	0.884605	0.677487	0.878798					35				0.375422	0.374865	0.512573
	50	4.61701	4.26276	4.86569	3.99531	4.87507			2.6651	4.63343		50	0.952353	0.879281	1.00365	0.824115	1.00558			50	0.79068	0.964788			0.52743	0.916966
	65	4.11026	4.96891	5.93783	4.68974	5.32551	5.21525	4.16891	2.55249	3.79824		65	0.847827	1.02494	1.2248	0.967355	1.0985	1.07575		65	0.928109	1.05393	1.03211	0.825038	0.505144	0.75168
	S782N Biological Replicate 2
	Raw rates (Fig. S2F)											Normalized to WT 2-hep (Fig. 2C)								Normalized to Mut. 2-hep (Fig. 5D)
	[actin], uM	WT 2-hep			S782N 2-hep			S782N 25-hep				[actin], uM	WT 2-hep			S782N 2-hep				[actin], uM	S782N 2-hep			S782N 25-hep
	0	0.0361333	0.03344	0.0331467	0.0382667	0.0449067	0.0424	0.0237067	0.0225147	0.0238453		0	0.00777563	0.00719604	0.00713292	0.0082347	0.00966358	0.00912417		0	0.00800558	0.0093947	0.00887029	0.00495955	0.00471018	0.00498856
	75		4.24		5.05867	4.30133	4.78133	3.2		3.50667		75		0.912417		1.08859	0.925615	1.02891		75	1.0583	0.899861	1.00028	0.669456		0.733612
	5	2.0784	1.4504	1.76613	1.85227	1.95067	1.776	0.758133	0.705333	0.8824		5	0.447256	0.312115	0.380059	0.398594	0.419769	0.382182		5	0.387503	0.408089	0.371548	0.158605	0.147559	0.184603
	35	3.50667	3.18933	3.48	3.512	3.672	3.14667	2.71467	2.10133	2.5048		35	0.754609	0.686321	0.74887	0.755756	0.790187	0.677139		35	0.734728	0.768201	0.658298	0.567922	0.439609	0.524017
	2.5	1.12507	1.07893	1.03173	1.1432	1.07093	1.24667	0.5336	0.552533	0.5616		2.5	0.242106	0.232178	0.222021	0.246008	0.230457	0.268273		2.5	0.239163	0.224045	0.260809	0.111632	0.115593	0.11749
	55	4.39467	4.072	4.16267	4.128	4.192	3.78933	2.53893	3.664	2.74933		55	0.9457	0.876264	0.895775	0.888315	0.902087	0.815436		55	0.863598	0.876987	0.792748	0.531158	0.766527	0.575174
	20	3.032	3.08	3.09867	3.57333	3.23733	3.61333	1.7728	1.82533	2.12667		20	0.652464	0.662793	0.66681	0.768955	0.69665	0.777563		20	0.747559	0.677266	0.755927	0.370879	0.381869	0.444909
	10	2.41573	2.43067	2.0392	2.4912	2.94933	2.752	1.26773	1.2048	1.25013		10	0.519848	0.523061	0.438821	0.536088	0.634675	0.59221		10	0.521172	0.617015	0.575732	0.265216	0.25205	0.261534
	A797T Biological Replicate 1
	Raw rates (Fig. S2G)											Normalized to WT 2-hep								Normalized to Mut. 2-hep
	[actin], uM	WT 2-hep			A797T 2-hep			A797T 25-hep				[actin], uM	WT 2-hep			A797T 2-hep				[actin], uM	A797T 2-hep			A797T 25-hep
	0	0.0440329	0.0458985	0.0461728	0.0516049	0.0598354	0.061893	0.0545405	0.0615912	0.0519067		0	0.00628772	0.00655412	0.00659329	0.00736898	0.00854425	0.00883807		0	0.0082436	0.00955837	0.00988706	0.00871254	0.00983885	0.00829181
	75	6.75446	5.49246	8.11523	7.33608	5.44582	4.11797	3.22908	4.65295	7.58573		75	0.964509	0.7843	1.15882	1.04756	0.77764	0.588029		75	1.1719	0.869939	0.657823	0.515828	0.743283	1.21178
	5	2.74623	2.24554	2.62085	3.39643	3.25652	3.57202	1.86475	1.40466	1.70508		5	0.39215	0.320654	0.374247	0.484997	0.465017	0.510069		5	0.542561	0.52021	0.57061	0.297883	0.224387	0.272376
	35	4.38134	4.82853	5.21262	5.62414	5.93141	5.48422	4.87517	4.46639	4.50206		35	0.625638	0.689495	0.744341	0.803105	0.846982	0.783125		35	0.898425	0.94751	0.876074	0.778781	0.713481	0.719179
	2.5	1.87462	2.15391	2.0749	2.20768	2.41344	2.48148	1.40796	1.53114	1.44691		2.5	0.267689	0.30757	0.296287	0.315248	0.34463	0.354345		2.5	0.352665	0.385534	0.396403	0.224913	0.244591	0.231136
	55	6.27435	4.68587	7.3251	7.61591			7.76132	7.25103	7.1797		55	0.895952	0.669123	1.04599	1.08752				55	1.2166			1.23983	1.15831	1.14692
	20	3.75583	4.30727	4.83128	3.83813	4.41152	4.9904	3.38272	3.13306	3.55556		20	0.536317	0.615061	0.689887	0.54807	0.629948	0.712609		20	0.613121	0.704716	0.797188	0.54037	0.500489	0.56798
	10	3.68999	3.28944	3.6214	3.65432	3.90947	4.05487	2.7262	2.79012	2.66447		10	0.526915	0.469718	0.517121	0.521822	0.558256	0.579019		10	0.583757	0.624515	0.647743	0.435495	0.445707	0.425634
	A797T Biological Replicate 2
	Raw rates (Fig. S2H)											Normalized to WT 2-hep (Fig. 2D)								Normalized to Mut. 2-hep (Fig. 5E)
	[Actin], uM	WT 2-hep			A797T 2-hep			A797T 25-hep				[Actin], uM	WT 2-hep			A797T 2-hep				[Actin], uM	A797T 2-hep			A797T 25-hep
	0	0.0922092	0.140448	0.11254	0.0851121	0.102721	0.107204	0.0925827	0.0757204	0.0759872		0	0.0183793	0.0279945	0.0224317	0.0169647	0.0204747	0.0213681		0	0.0175597	0.0211928	0.0221176	0.019101	0.0156221	0.0156772
	80	4.25827		4.39701	5.13981	4.97545		3.85486		4.41195		80	0.848768		0.876423	1.02448	0.991719			80	1.06041	1.0265		0.795308		0.910244
	5	1.16414	1.59509	1.65507	1.74536	1.82946	1.6826	1.06403	1.03842	1.06297		5	0.232039	0.317937	0.329892	0.347889	0.364651	0.335381		5	0.36009	0.377441	0.347143	0.219524	0.21424	0.219304
	40	3.66916	3.62006	3.52188		3.52188	3.37673	3.64995	3.26574			40	0.731345	0.72156	0.701989		0.701989	0.673058		40		0.72661	0.696665	0.753032	0.673766
	2.5	0.947279	1.10608	0.821772	1.17375	1.16713	1.308	0.827962	0.618143	0.756884		2.5	0.188814	0.220467	0.163797	0.233954	0.232635	0.260714		2.5	0.242159	0.240794	0.269859	0.170819	0.127531	0.156155
	60	4.48026	4.68943	3.8207	4.24973	3.84632	3.76094	4.37353	3.68623	3.76948		60	0.893015	0.934709	0.761552	0.847067	0.766657	0.749639		60	0.876776	0.793546	0.775931	0.902317	0.760518	0.777693
	25	3.0715	3.04803	3.03522	3.01174	3.33831	2.77268	2.08602		2.44824		25	0.612219	0.607539	0.604987	0.600307	0.6654	0.552657		25	0.621362	0.688738	0.57204	0.430373		0.505104
	10	2.31377	2.23266	1.85784	2.06275	2.29242	2.39274	1.55069	1.30053	1.44632		10	0.461185	0.445018	0.37031	0.411153	0.456931	0.476927		10	0.425573	0.472957	0.493654	0.319929	0.268317	0.298394
	F834L Biological Replicate 1
	Raw rates (Fig. S2I)											Normalized to WT 2-hep								Normalized to Mut. 2-hep
	[Actin], uM	WT 2-hep			F834L 2-hep			F834L 25-hep				[Actin], uM	WT 2-hep			F834L 2-hep				[Actin], uM	F834L 2-hep			F834L 25-hep
	0	0.0469097	0.0915278	0.103854	0.091875	0.0768403	0.0876389	0.0806944	0.0875	0.1025		0	0.00525776	0.0102587	0.0116402	0.0102976	0.00861245	0.00982279		0	0.00984832	0.00823671	0.00939424	0.00864985	0.00937935	0.0109872
	5	4.12153	4.07639	4.09722	4.23958	4.74306	5.49306	3.69792	3.36215	3.39375		5	0.461951	0.456892	0.459227	0.475183	0.531613	0.615675		5	0.454452	0.508421	0.588815	0.396389	0.360398	0.363785
	10	6.42708	5.42708	4.88542	5.375	6.07639	6.20139	4.43056	4.15625	3.94097		10	0.720364	0.608281	0.54757	0.602443	0.681057	0.695067		10	0.57616	0.651344	0.664743	0.474923	0.445519	0.422443
	20	7.53819	5.51736	5.43403	5.96875	4.78472	6.85069	5.88194	4.74653	4.63194		20	0.8449	0.6184	0.609059	0.668992	0.536284	0.767843		20	0.639806	0.512887	0.734344	0.630501	0.508793	0.49651
	30	7.05903	8.20833	6.24306	7.72222	8.44792	8.05208	7.125	7.94444	6.79514		30	0.791193	0.92001	0.699737	0.865526	0.946864	0.902498		30	0.827765	0.905554	0.863124	0.763747	0.851586	0.728389
	45	6.97222	9.56597	5.63889	7.125	7.77083	6.38194	7.59722		6.90625		45	0.781464	1.07218	0.632021	0.798588	0.870974	0.715304		45	0.763747	0.832976	0.684097	0.814366		0.740299
	60	9.625	6.72222	7.45139	8.77778	9.91667	8.98264	7.77431	6.26736			60	1.07879	0.753443	0.83517	0.983835	1.11148	1.0068		60	0.940913	1.06299	0.962873	0.833348	0.671815
	75	11.1875	7.49306	8.19097	8.40278	7.51389	11.9271	6.61458	7.77431	7.6875		75	1.25392	0.83984	0.918065	0.941804	0.842175	1.33682		75	0.900716	0.805433	1.2785	0.709035	0.833348	0.824043
	F834L Biological Replicate 2
	Raw rates (Fig. S2J)											Normalized to WT 2-hep (Fig. 2E)								Normalized to Mut. 2-hep (Fig. 5F)
	[actin], uM	WT 2-hep			F834L 2-hep			F834L 25-hep				[actin], uM	WT 2-hep			F834L 2-hep				[actin], uM	F834L 2-hep			F834L 25-hep
	0	0.168163	0.172439	0.129831	0.138332	0.105544	0.111035	0.092661	0.137804	0.0935058		0	0.0362263	0.0371476	0.0279688	0.0298	0.0227367	0.0239196		0	0.0311979	0.0238033	0.0250417	0.0208978	0.0310788	0.0210884
	80	3.64942	4.40127	4.08237	4.15417	4.55333	3.98944	3.00106	2.99261	3.12566		80	0.786174	0.94814	0.879441	0.89491	0.980898	0.859423		80	0.93689	1.02691	0.899738	0.676828	0.674923	0.70493
	5	1.42936	1.44139	1.4925	1.53537	1.68807	1.37508	1.14192	1.29905	1.20824		5	0.307918	0.310511	0.321521	0.330757	0.363651	0.296226		5	0.346273	0.38071	0.310122	0.257538	0.292975	0.272494
	40	3.53537	3.55861	3.45723	3.34108	3.5227	3.53537	2.72017	2.71383	2.27878		40	0.761606	0.766611	0.744772	0.719749	0.758876	0.761606		40	0.753513	0.794475	0.797333	0.61348	0.612051	0.513932
	2.5	1.02936	1.50623	1.21098	1.10137	1.25723	1.12904	0.865048	0.852587	0.827244		2.5	0.221748	0.324479	0.260875	0.237263	0.270839	0.243223		2.5	0.248393	0.283544	0.254632	0.195094	0.192284	0.186568
	60	3.89229	4.01267	4.28089	3.3453	3.8226	3.43611	2.70539	2.85744	2.40549		60	0.838494	0.864427	0.922207	0.720659	0.823481	0.740223		60	0.754466	0.86211	0.774947	0.610146	0.644439	0.54251
	25	2.95459	2.81309	2.68849	2.78986	2.76241	2.74129	2.48152	2.43083	2.62091		25	0.636491	0.606009	0.579166	0.601004	0.59509	0.59054		25	0.629198	0.623006	0.618243	0.559657	0.548226	0.591093
	10	1.75797	1.99113	1.80971	1.93136	1.90264	1.79958	1.47772	1.44372	1.47202		10	0.37871	0.428938	0.389857	0.416063	0.409875	0.387673		10	0.43558	0.429102	0.405859	0.33327	0.325601	0.331984
	WT Biological Replicate 1
	Raw rates (Fig. S2K)																			Normalized to WT 2-hep (Fig. 5A)
	[actin], uM	WT 2-hep			WT 25-hep															[actin], uM	WT 2-hep			WT 25-hep
	0	0.0886062	0.0769911	0.0818584	0.075719	0.0681416	0.141372													0	0.0163269	0.0141867	0.0150835	0.0139523	0.012556	0.0260497
	80	4.46018	4.5885	5.42035	2.71018	2.66593	3.31195													80	0.821849	0.845494	0.998775	0.499388	0.491234	0.610272
	2.5	1.0927	1.15863	0.998451	0.661947	0.510177	0.511062													2.5	0.201345	0.213493	0.183979	0.121973	0.0940072	0.0941703
	25	3.24115	3.26106	3.33628	1.43451	1.62389	1.71482													25	0.597227	0.600896	0.614756	0.264329	0.299225	0.31598
	1.25	0.748894	0.897124	0.790929	0.548894	0.395796	0.430752													1.25	0.137994	0.165308	0.14574	0.101141	0.072931	0.0793721
	50	4.2146	4.61504	4.08186	2.075	2.46681	2.25221													50	0.776599	0.850386	0.752139	0.382348	0.454545	0.415001
	10	2.02876	2.35619	2.34071	0.88385	0.893805	1.15509													10	0.373827	0.434162	0.431308	0.162862	0.164696	0.212841
	5	1.5365	1.45044	1.64093	0.59646	0.580973	0.644911													5	0.283122	0.267264	0.302364	0.109906	0.107052	0.118834
	WT Biological Replicate 2
	Raw rates (Fig. S2L)																			Normalized to WT 2-hep
	[actin], uM	WT 2-hep			WT 25-hep															[actin], uM	WT 2-hep			WT 25-hep
	0	0.176964	0.156436	0.115608																0	0.0293132	0.0259128	0.01915
	5		2.5729	2.75847																5		0.426188	0.456928
	10	3.89715	3.92464	3.74594	0.821851	1.07276	0.530636													10	0.645544	0.650098	0.620496	0.136136	0.177698	0.0878973
	20	5.01749	4.97167	3.95443	1.0695	1.43841	0.728038													20	0.831123	0.823533	0.655031	0.177158	0.238266	0.120596
	35		4.80671																	35		0.796209
	40				1.21666	1.31699	1.31373													40				0.201533	0.218152	0.217613
	50	4.88461																		50	0.809112
	60				2.28787	2.04091	1.83339													60				0.378975	0.338066	0.303692
	65	6.06681	4.77693																	65	1.00494	0.791275
	80	6.0691	5.38407	6.15846	2.40107	2.35133	2.28959													80	1.00532	0.891845	1.02012	0.397725	0.389487	0.379259
	100				2.71664	2.69949	2.35476													100				0.449998	0.447157	0.390055
	WT Biological Replicate 3
	Raw rates (Fig. S2M)																			Normalized to WT 2-hep
	[actin], uM	WT 2-hep			WT 25-hep															[actin], uM	WT 2-hep			WT 25-hep
	0	0.0397351	0.0349139	0.038596	0.028053	0.0274702	0.0285563													0	0.0065386	0.00574525	0.00635117	0.00461625	0.00452036	0.00469908
	75	4.95894	4.99073	4.9351	3.29007	3.13377	3.06755													75	0.816018	0.821249	0.812095	0.541396	0.515678	0.50478
	2.5	0.95894	1.43841	1.13272	0.941192	0.964768	0.804238													2.5	0.157798	0.236697	0.186394	0.154878	0.158757	0.132341
	25	3.37483	3.43311	3.41457	2.12874	1.92079	1.88821													25	0.555345	0.564935	0.561884	0.350295	0.316076	0.310714
	50	4.74437	4.36821	4.52715	3.12053	2.6702	3.0649													50	0.780709	0.718811	0.744965	0.513498	0.439394	0.504344
	10	2.31523	2.1147	1.94596	1.13669	1.15099	1.18596													10	0.380983	0.347985	0.320217	0.187048	0.189402	0.195156
	5	1.44848	1.2755	1.13616	0.817748	0.819073	0.908079													5	0.238354	0.209889	0.18696	0.134564	0.134782	0.149429
	WT Biological Replicate 4
	Raw rates (Fig. S2N)																			Normalized to WT 2-hep
	[actin], uM	WT 2-hep			WT 25-hep															[actin], uM	WT 2-hep			WT 25-hep
	0	0.0563295	0.0498266	0.049133	0.029133	0.0283439	0.0277543													0	0.00906931	0.00802231	0.00791063	0.00469054	0.00456351	0.00446858
	2.5	1.78353	1.50636	1.55751	0.585549	0.754913	0.639306													2.5	0.287156	0.242531	0.250767	0.0942761	0.121545	0.102931
	20	4.63295	3.84682	3.84682	2.19538	2.35607	2.22601													20	0.745926	0.619356	0.619356	0.353466	0.379338	0.358398
	60	5.9422	5.39017	5.43931	2.85116	3.02023	2.83931													60	0.956721	0.867843	0.875754	0.459049	0.486271	0.457142
	40	5.09249	4.66474	4.6474	2.36503	2.37168	2.58786													40	0.819914	0.751045	0.748253	0.380781	0.381851	0.416658
	10	2.87486	3.13584	2.76763	1.19364	1.1474	1.27572													10	0.462865	0.504885	0.445601	0.192182	0.184737	0.205397
	5	2.13179	2.18555	2.11329	0.791329	0.81474	0.789595													5	0.343228	0.351884	0.34025	0.127408	0.131177	0.127129
	WT Biological Replicate 5
	Raw rates (Fig. S2O)																			Normalized to WT 2-hep
	[actin], uM	WT 2-hep			WT 25-hep															[actin], uM	WT 2-hep			WT 25-hep
	2.5	1.16921	1.2118	1.19422	0.585385	0.576788	0.619773													2.5	0.182831	0.189492	0.186742	0.0915379	0.0901936	0.0969153
	20	3.40367	3.32552	3.32395	1.60805	1.52169	1.62993													20	0.53224	0.520018	0.519774	0.251454	0.23795	0.254876
	60	5.38492	4.94334	5.06057	2.70809	2.66706	2.78195													60	0.842051	0.773	0.791332	0.42347	0.417054	0.435019
	40	4.7714	4.59164	4.5213	2.18327	2.08949	2.22743													40	0.746113	0.718004	0.707005	0.341403	0.326738	0.348308
	10	2.40133	2.26417	2.26065	1.06526	1.07659	1.18523													10	0.375501	0.354052	0.353503	0.166577	0.168349	0.185337
	5	1.71395	1.70809	1.6358	0.82923	0.905432	0.894881													5	0.268014	0.267098	0.255793	0.129669	0.141584	0.139934
	0	0.0497851	0.058773	0.0569363	0.0624072	0.033814	0.0412661													0	0.007785	0.00919046	0.00890325	0.00975875	0.00528757	0.00645287
