# Supplementary material for: Hypertrophic cardiomyopathy mutations in the pliant and light chain-binding regions of the lever arm of human β-cardiac myosin have divergent effects on myosin function
Source: eLife. 2022 Jun 29;11:e76805. doi: 10.7554/eLife.76805 (PMC9242648; doi:10.7554/eLife.76805)
Supplement: Figure 3—source data 1. — Turnover rate per second vs (actin) of the actin-activated ATPase activity of each mutant 2-hep myosin along with its same day WT control. Raw rates are depicted in the left-hand boxes and rates normalized to WT 2-hep control are shown in the right-hand boxes. Data shown is for all technical replicates of the depicted representative biological replicate for each mutant/WT pair. [file elife-76805-fig3-data1.xlsx]

## Sheet: Fig. 3A-E
	D778V Biological Replicate 2
	Raw rates											Normalized to WT 2-hep
	[actin], uM	WT 2-hep			D778V 2-hep							[actin], uM	WT 2-hep			D778V 2-hep
	0	0.0447246	0.0445532	0.0425214	0.0409547	0.0419094	0.0414443					0	0.00696971	0.006943	0.00662637	0.00638222	0.006531	0.00645852
	75	6.51652	6.31824		7.5202	6.70257	6.93023					75	1.01551	0.984609		1.17192	1.0445	1.07998
	5	2.42081	2.4896	2.46022	2.53366	2.65851	2.612					5	0.377249	0.387969	0.383391	0.394836	0.414291	0.407043
	35	4.96206	4.87148	5.07466	5.93635	5.76744	6.08813					35	0.773267	0.759152	0.790816	0.925098	0.898775	0.94875
	2.5	1.74492	1.82032	1.92142	1.96524	2.31138	1.95814					2.5	0.271922	0.283671	0.299426	0.306255	0.360197	0.305149
	55	5.41493	5.56671	5.11138	5.96818	5.6328	6.13953					55	0.843842	0.867494	0.796538	0.930057	0.877794	0.956761
	20	4.25949	4.29131	4	4.56059	4.58017	4.22766					20	0.663782	0.668741	0.623344	0.710704	0.713756	0.658822
	10	3.32681	3.16034	3.20685	3.66952	3.50306	3.75275					10	0.518436	0.492495	0.499744	0.571844	0.545903	0.584814
	L781P Biological Replicate 2
	Raw rates (Fig. S2D)											Normalized to WT 2-hep (Fig. 2B)
	[actin], uM	WT 2-hep			L781P 2-hep							[actin], uM	WT 2-hep			L781P 2-hep
	0	0.149842	0.156286	0.159507	0.117814	0.112192	0.135565					0	0.0309655	0.0322971	0.0329629	0.0243468	0.023185	0.0280152
	80	4.8187	4.42198	4.56349	4.57865	4.73784	4.53316					80	0.995805	0.913822	0.943064	0.946197	0.979095	0.936798
	5	1.75237	1.66646	1.75237	2.05407	1.99343	1.97498					5	0.362135	0.34438	0.362135	0.424483	0.411951	0.408139
	40	3.33291	3.97726	3.87871	4.09097	3.87618	3.88882					40	0.688761	0.821917	0.801552	0.845416	0.80103	0.803641
	2.5	1.31169	1.58307	1.6144	1.50954	1.45243	1.39987					2.5	0.271066	0.327148	0.333623	0.311953	0.300151	0.28929
	60	4.36134	4.34365	4.13645	4.11623	4.24258	3.96968					60	0.901289	0.897634	0.854815	0.850638	0.876747	0.820351
	25	3.60581	3.40114	3.44409	3.49716	3.36323	3.49463					25	0.745156	0.702859	0.711737	0.722702	0.695027	0.72218
	10	2.48541	2.38181	2.3439	2.61529	2.57233	2.51244					10	0.51362	0.492211	0.484378	0.54046	0.531583	0.519207
	S782N Biological Replicate 2
	Raw rates (Fig. S2F)											Normalized to WT 2-hep (Fig. 2C)
	[actin], uM	WT 2-hep			S782N 2-hep							[actin], uM	WT 2-hep			S782N 2-hep
	0	0.0361333	0.03344	0.0331467	0.0382667	0.0449067	0.0424					0	0.00777563	0.00719604	0.00713292	0.0082347	0.00966358	0.00912417
	75		4.24		5.05867	4.30133	4.78133					75		0.912417		1.08859	0.925615	1.02891
	5	2.0784	1.4504	1.76613	1.85227	1.95067	1.776					5	0.447256	0.312115	0.380059	0.398594	0.419769	0.382182
	35	3.50667	3.18933	3.48	3.512	3.672	3.14667					35	0.754609	0.686321	0.74887	0.755756	0.790187	0.677139
	2.5	1.12507	1.07893	1.03173	1.1432	1.07093	1.24667					2.5	0.242106	0.232178	0.222021	0.246008	0.230457	0.268273
	55	4.39467	4.072	4.16267	4.128	4.192	3.78933					55	0.9457	0.876264	0.895775	0.888315	0.902087	0.815436
	20	3.032	3.08	3.09867	3.57333	3.23733	3.61333					20	0.652464	0.662793	0.66681	0.768955	0.69665	0.777563
	10	2.41573	2.43067	2.0392	2.4912	2.94933	2.752					10	0.519848	0.523061	0.438821	0.536088	0.634675	0.59221
	A797T Biological Replicate 2
	Raw rates (Fig. S2H)											Normalized to WT 2-hep (Fig. 2D)
	[Actin], uM	WT 2-hep			A797T 2-hep							[Actin], uM	WT 2-hep			A797T 2-hep
	0	0.0922092	0.140448	0.11254	0.0851121	0.102721	0.107204					0	0.0183793	0.0279945	0.0224317	0.0169647	0.0204747	0.0213681
	80	4.25827		4.39701	5.13981	4.97545						80	0.848768		0.876423	1.02448	0.991719
	5	1.16414	1.59509	1.65507	1.74536	1.82946	1.6826					5	0.232039	0.317937	0.329892	0.347889	0.364651	0.335381
	40	3.66916	3.62006	3.52188		3.52188	3.37673					40	0.731345	0.72156	0.701989		0.701989	0.673058
	2.5	0.947279	1.10608	0.821772	1.17375	1.16713	1.308					2.5	0.188814	0.220467	0.163797	0.233954	0.232635	0.260714
	60	4.48026	4.68943	3.8207	4.24973	3.84632	3.76094					60	0.893015	0.934709	0.761552	0.847067	0.766657	0.749639
	25	3.0715	3.04803	3.03522	3.01174	3.33831	2.77268					25	0.612219	0.607539	0.604987	0.600307	0.6654	0.552657
	10	2.31377	2.23266	1.85784	2.06275	2.29242	2.39274					10	0.461185	0.445018	0.37031	0.411153	0.456931	0.476927
	F834L Biological Replicate 2
	Raw rates (Fig. S2J)											Normalized to WT 2-hep (Fig. 2E)
	[actin], uM	WT 2-hep			F834L 2-hep			F834L 25-hep				[actin], uM	WT 2-hep			F834L 2-hep
	0	0.168163	0.172439	0.129831	0.138332	0.105544	0.111035	0.092661	0.137804	0.0935058		0	0.0362263	0.0371476	0.0279688	0.0298	0.0227367	0.0239196
	80	3.64942	4.40127	4.08237	4.15417	4.55333	3.98944	3.00106	2.99261	3.12566		80	0.786174	0.94814	0.879441	0.89491	0.980898	0.859423
	5	1.42936	1.44139	1.4925	1.53537	1.68807	1.37508	1.14192	1.29905	1.20824		5	0.307918	0.310511	0.321521	0.330757	0.363651	0.296226
	40	3.53537	3.55861	3.45723	3.34108	3.5227	3.53537	2.72017	2.71383	2.27878		40	0.761606	0.766611	0.744772	0.719749	0.758876	0.761606
	2.5	1.02936	1.50623	1.21098	1.10137	1.25723	1.12904	0.865048	0.852587	0.827244		2.5	0.221748	0.324479	0.260875	0.237263	0.270839	0.243223
	60	3.89229	4.01267	4.28089	3.3453	3.8226	3.43611	2.70539	2.85744	2.40549		60	0.838494	0.864427	0.922207	0.720659	0.823481	0.740223
	25	2.95459	2.81309	2.68849	2.78986	2.76241	2.74129	2.48152	2.43083	2.62091		25	0.636491	0.606009	0.579166	0.601004	0.59509	0.59054
	10	1.75797	1.99113	1.80971	1.93136	1.90264	1.79958	1.47772	1.44372	1.47202		10	0.37871	0.428938	0.389857	0.416063	0.409875	0.387673

## Sheet: Fig. 3F In vitro motility
	Fig. 2F: In Vitro Motility Normalized to WT Control							Full In Vitro Motility FAST (Fast Automated Spud Tracker) Results					Note: Frozen proteins were used; thus, in some cases, mutant proteins on the same slide had different WT pairs from the frozen same day prep (i.e., 8/14/19), and in some cases proteins on the same slide all had the same WT pair (i.e., 5/3/21)
	D778V	L781P	S782N	A797T	F834L			2018-12-06
	1.41171	0.660215	0.953319	0.984201	1.11404			Slide 1	MVEL filtered	Top 5	MVEL unfiltered	% stuck	Filament length	Normalized MVEL Filtered
	1.38271	0.85	1.02799	1.00172	0.80917			2 hep WT	465	605	375	19	1.966
	1.45147	0.639604	1.00384	0.837359	1.05423			L781P	307	387	296	5	0.776	0.660215
	1.59535	0.675824	0.967458	0.919149	0.908397			Slide 2
	1.45236	0.695063	0.987365	0.95283	1.10531			2 hep WT	480	629	401	33	2.664
			0.96903	0.928571	1.11713			L781P	408	507	362	7	1.201	0.85
			0.980565	1.0029
			0.907509					2019-01-31
			1.02517					Slide 1	MVEL filtered	Top 5	MVEL unfiltered	% stuck	Filament length	Normalized MVEL Filtered
								2 hep WT	807	1027	730	18	0.633
								F834L	653	894	484	39	0.591	0.80917
								Slide 2
								WT	627	808	540	46	1.585
								F834L	661	808	534	28	0.814	1.05423
								Slide 3
								WT	655	874	511	35	0.91
								F834L	595	814	441	48	0.876	0.908397
								2019-06-06
								Slide 1	MVEL filtered	Top 5	MVEL unfiltered	% stuck	Filament length	Normalized MVEL Filtered
								WT F834L pair	384	489	277	60	0.406
								F834L	240	396	262	67	0.229
								WT L781P pair	455	611	403	56	0.478
								L781P	469	614	387	40	1.71
								2019-08-14
								Slide 1	MVEL filtered	Top 5	MVEL unfiltered	% stuck	Filament length	Normalized MVEL Filtered
								WT L781P pair	1010	1256	872	9	2.204
								L781P	646	793	569	3	2.566	0.639604
								WT F834L pair	1517	1262	1151	7	2.433
								F834L	1690	1405	1278	8	1.213	1.11404
								WT S782N pair	1371	1105	980	9	1.41
								S782N	1307	1032	929	10	1.039	0.953319
								2020-06-06
								Slide 1	MVEL filtered	Top 5	MVEL unfiltered	% stuck	Filament length	Normalized MVEL Filtered
								WT D778V pair	1059	1352	906	11	2.107
								D778V	1495	1930	1219	12	1.586	1.41171
								WT A797T pair	1076	1326	982	6	1.494
								A797T	1059	1310	965	6	1.455	0.984201
								Slide 2
								WT D778V pair	1168	1461	1032	5	2.06
								D778V	1615	2086	1321	13	1.228	1.38271
								WT A797T pair	1165	1434	1047	6	1.327
								A797T	1167	1430	1068	5	1.211	1.00172
								2020-06-10
								Slide 1	MVEL filtered	Top 5	MVEL unfiltered	% stuck	Filament length	Normalized MVEL Filtered
								WT	1036	1276	935	9	0.941
								S782N	1065	1316	928	12	1.068	1.02799
								WT	1042	1290	931	10	1.079
								S782N	1046	1297	927	9	1.058	1.00384
								Slide 2
								WT	1137	1374	1034	5	0.852
								S782N	1100	1382	918	22	1.418	0.967458
								WT	1108	1380	966	13	0.973
								S782N	1094	1389	889	14	1.55	0.987365
								Slide 3
								WT	1227	1518	1084	13	1.369
								S782N	1189	1478	1024	19	1.976	0.96903
								WT	1132	1431	974	14	2.291
								S782N	1110	1396	946	21	2.75	0.980565
								2020-07-10
								Slide 1	MVEL filtered	Top 5	MVEL unfiltered	% stuck	Filament length	Normalized MVEL Filtered
								WT	621	865	496	20	0.766
								A797T	520	732	411	32	0.664	0.837359
								Slide 2
								WT	470	727	404	40	2.284
								A797T	432	647	390	47	2.826	0.919149
								Slide 3
								WT	636	925	482	25	1.131
								A797T	606	859	474	22	0.986	0.95283
								2021-05-03
								Slide 1	MVEL filtered	Top 5	MVEL unfiltered	% stuck	Filament length	Normalized MVEL Filtered
								WT	1092	1386	934	17	0.934
								D778V	1585	2147	1129	39	1.202	1.45147
								L781P	738	930	659	5	1.061	0.675824
								S782N	991	1341	792	28	1.32	0.907509
								A797T	1014	1314	937	15	0.594	0.928571
								F834L	1207	1555	1009	18	1.104	1.10531
								Slide 2
								WT	1033	1354	854	20	1.696
								D778V	1648	2209	1240	27	1.6	1.59535
								L781P	718	910	628	6	1.725	0.695063
								S782N	1059	1376	897	19	1.416	1.02517
								A797T	1036	1340	878	13	1.088	1.0029
								F834L	1154	1511	961	23	1.631	1.11713
								Slide3
								WT	1081	1390	890	12	1.817
								D778V	1570	2109	1203	31	2.05	1.45236
