# Supplementary material for: Hypertrophic cardiomyopathy mutations in the pliant and light chain-binding regions of the lever arm of human β-cardiac myosin have divergent effects on myosin function
Source: eLife. 2022 Jun 29;11:e76805. doi: 10.7554/eLife.76805 (PMC9242648; doi:10.7554/eLife.76805)
Supplement: Figure 4—figure supplement 1—source data 1. — (Q–T) Data of displacement measurements binned in the histogram of displacements (obtained from each event) of one representative molecule of WT (Q), D778V (R), L781P (S), and S782N (T). [file elife-76805-fig4-figsupp1-data1.xlsx]

## Sheet: Sheet1
I	Force (pN)	Kdet	Kdet (error)			Number of events	Displacement (nm) beginning of the bin	Displacement (nm) end of the bin
	-3.06165	578.071	194.363		Q	2	-15	-12
	-1.7695	436.245	71.1977			8	-12	-9
	-0.309512	238.784	52.8004			19	-9	-6
	1.37124	239.048	34.8255			14	-6	-3
	2.65963	89.1538	7.99196			39	-3	0
	4.01673	49.4653	8.89613			46	0	3
						40	3	6
J	-4.08648	635.611	195.789			26	6	9
	-2.27737	705.268	139.324			26	9	12
	0.200804	550.306	111.724			21	12	15
	2.50726	354.141	37.1884			8	15	18
	4.67114	253.952	23.985			1	18	21
	6.70942	158.399	16.8578
					R	5	-10	-5
K	-3.40208	263.46	44.1858			13	-5	0
	-1.70485	221.674	28.0735			33	0	5
	0.388361	114.626	14.413			22	5	10
	2.15066	102.355	8.71419			8	10	15
	3.98832	47.9741	5.06904			6	15	20
	5.74542	33.7932	5.56217
					S	7	-20	-15
L	-3.7102	296.321	55.596			28	-15	-10
	-2.35232	315.47	40.8715			34	-10	-5
	-0.533601	207.219	34.2494			52	-5	0
	1.67599	185.216	19.8997			66	0	5
	3.1928	102.469	7.80865			79	5	10
	4.90057	46.2823	5.58417			68	10	15
						31	15	20
						6	20	25
						2	25	30
					T	1	-25	-20
						2	-20	-15
						17	-15	-10
						20	-10	-5
						17	-5	0
						29	0	5
						37	5	10
						42	10	15
						19	15	20
						1	20	25
