# Supplementary material for: Hypertrophic cardiomyopathy mutations in the pliant and light chain-binding regions of the lever arm of human β-cardiac myosin have divergent effects on myosin function
Source: eLife. 2022 Jun 29;11:e76805. doi: 10.7554/eLife.76805 (PMC9242648; doi:10.7554/eLife.76805)
Supplement: Figure 4—figure supplement 2—source data 1. — Data matches data from Figure 4—source data 1, with the addition of the column entitled ‘prep number; which denotes the myosin prep from which each molecule originated. [file elife-76805-fig4-figsupp2-data1.xlsx]

## Sheet: Fig. 4 HFS
		Each row represents a single myosin molecule, where the SD comes from measurements of multiple stroking events from each individual molecule.																										Step size is not measured for each stroking event, but is rather summarized from all events of an individual molecule. Thus, SD per molecule is not calculated.
		The molecules are shown in the same order in each table.
		k0 (Detachment rate, s-1)													delta (force sensitivity)													Step size (nm)
	WT			D778V			L781P			S782N				WT			D778V			L781P			S782N				WT		D778V		L781P		S782N
	Prep Number	Mean	SD	Prep Number	Mean	SD	Prep Number	Mean	SD	Prep Number	Mean	SD		Prep Number	Mean	SD	Prep Number	Mean	SD	Prep Number	Mean	SD	Prep Number	Mean	SD		Prep Number	Mean	Prep Number	Mean	Prep Number	Mean	Prep Number	Mean
	1	153	9	1	307	14	1	138	9	1	137	7		1	1.19	0.11	1	0.58	0.08	1	0.75	0.06	1	0.9	0.06		1	4	1	5.9	1	4	1	5.4
	1	149		1	371	15	1	107	6	1	118	6		1	1.22		1	0.6	0.05	1	0.81	0.05	1	0.94	0.07		1	6.3	1	4.8	1	5.6	1	5
	1	154	8	2	362	19	1	55	3	1	155	6		1	1.07	0.07	2	0.72	0.08	1	0.8	0.07	1	0.61	0.07		1	2.8	2	3.3	1	2.6	1	3
	1	158	11	2	352	22	1	64	3	1	159	6		1	1.08	0.11	2	0.58	0.07	1	0.79	0.05	1	0.84	0.06		1	3.6	2	6.2	1	1.9	1	4.7
	1	160	7	2	227	16	1	93	6	1	170	6		1	1.21	0.06	2	0.92	0.12	1	0.68	0.06	1	0.82	0.06		1	4.9	2	4.2	1	3.5	1	2.5
	1	125	6	2	270	17	1	80	4	1	152	6		1	1.1	0.07	2	0.92	0.12	1	0.7	0.04	1	0.71	0.05		1	4.4	2	2.6	1	3.9	1	5.7
	1	131	8	2	309	20	1	73	5	1	177	8		1	0.88	0.08	2	0.64	0.11	1	0.86	0.05	1	0.71	0.07		1	3.1	2	5.4	1	2.3	1	5.7
	1	142	7	2	359	20	1	139	9	2	141	7		1	0.93	0.07	2	0.73	0.1	1	0.57	0.06	2	0.95	0.05		1	5.5	2	6.4	1	1.4	2	2.7
	2	188		3	341	19	1	131	7	2	126	8		2	0.82		3	0.76	0.09	1	0.69	0.05	2	0.73	0.05		2	6	3	3.3	1	0.9	2	4.3
	2	110		3	356	22	1	112	4	2	158	8		2	0.92		3	0.79	0.08	1	0.82	0.06	2	0.73	0.05		2	2.1	3	5.2	1	1.8	2	4.6
				3	258	14	1	126	8	2	105	5					3	0.44	0.07	1	0.94	0.08	2	1.16	0.05				3	4.9	1	0.3	2	3.6
				3	275	15	1	97	5								3	0.43	0.08	1	0.98	0.07							3	2.3	1	1.7
							1	95	5											1	0.97	0.07									1	2
							1	138	9											1	0.92	0.08									1	2.7
							1	56	3											1	1.09	0.07									1	1.6
							1	127	9											1	0.76	0.07									1	1.7
							2	109	4											2	0.76	0.04									2	3.6
							2	121	6											2	0.73	0.05									2	5.4
							2	92	5											2	1.05	0.06									2	2.2
							2	123	5											2	0.71	0.06									2	1.3
							2	93	4											2	0.78	0.04									2	1.6
							2	68	2											2	0.69	0.05									2	1.9
