# Supplementary material for: Hypertrophic cardiomyopathy mutations in the pliant and light chain-binding regions of the lever arm of human β-cardiac myosin have divergent effects on myosin function
Source: eLife. 2022 Jun 29;11:e76805. doi: 10.7554/eLife.76805 (PMC9242648; doi:10.7554/eLife.76805)
Supplement: Figure 4—source data 1. — Detachment rate k0, δ, and step size (nm) for all molecules of WT and mutant sS1 myosin, as measured by harmonic force spectroscopy. Each row represents an individual molecule. Molecules are show in the same order for each group of measurements. [file elife-76805-fig4-data1.xlsx]

## Sheet: Fig. 4 HFS
	Each row represents a single myosin molecule, where the SD comes from measurements of multiple stroking events from each individual molecule.																		Step size is not measured for each stroking event, but is rather summarized from all events of an individual molecule. Thus, SD per molecule is not calculated.
	The molecules are shown in the same order in each table.
	k0 (Detachment rate, s-1)									delta (force sensitivity)									Step size (nm)
	WT		D778V		L781P		S782N			WT		D778V		L781P		S782N			WT	D778V	L781P	S782N
	Mean	SD	Mean	SD	Mean	SD	Mean	SD		Mean	SD	Mean	SD	Mean	SD	Mean	SD		4	5.9	4	5.4
	153	9	307	14	138	9	137	7		1.19	0.11	0.58	0.08	0.75	0.06	0.9	0.06		6.3	4.8	5.6	5
	149		371	15	107	6	118	6		1.22		0.6	0.05	0.81	0.05	0.94	0.07		2.8	3.3	2.6	3
	154	8	362	19	55	3	155	6		1.07	0.07	0.72	0.08	0.8	0.07	0.61	0.07		3.6	6.2	1.9	4.7
	158	11	352	22	64	3	159	6		1.08	0.11	0.58	0.07	0.79	0.05	0.84	0.06		4.9	4.2	3.5	2.5
	160	7	227	16	93	6	170	6		1.21	0.06	0.92	0.12	0.68	0.06	0.82	0.06		4.4	2.6	3.9	5.7
	125	6	270	17	80	4	152	6		1.1	0.07	0.92	0.12	0.7	0.04	0.71	0.05		3.1	5.4	2.3	5.7
	131	8	309	20	73	5	177	8		0.88	0.08	0.64	0.11	0.86	0.05	0.71	0.07		5.5	6.4	1.4	2.7
	142	7	359	20	139	9	141	7		0.93	0.07	0.73	0.1	0.57	0.06	0.95	0.05		6	3.3	0.9	4.3
	188		341	19	131	7	126	8		0.82		0.76	0.09	0.69	0.05	0.73	0.05		2.1	5.2	1.8	4.6
	110		356	22	112	4	158	8		0.92		0.79	0.08	0.82	0.06	0.73	0.05			4.9	0.3	3.6
			258	14	126	8	105	5				0.44	0.07	0.94	0.08	1.16	0.05			2.3	1.7
			275	15	97	5						0.43	0.08	0.98	0.07						2
					95	5								0.97	0.07						2.7
					138	9								0.92	0.08						1.6
					56	3								1.09	0.07						1.7
					127	9								0.76	0.07						3.6
					109	4								0.76	0.04						5.4
					121	6								0.73	0.05						2.2
					92	5								1.05	0.06						1.3
					123	5								0.71	0.06						1.6
					93	4								0.78	0.04						1.9
					68	2								0.69	0.05
