# Supplementary material for: Hypertrophic cardiomyopathy mutations in the pliant and light chain-binding regions of the lever arm of human β-cardiac myosin have divergent effects on myosin function
Source: eLife. 2022 Jun 29;11:e76805. doi: 10.7554/eLife.76805 (PMC9242648; doi:10.7554/eLife.76805)
Supplement: Figure 6—source data 1. — Turnover rate per second vs (actin) of the actin-activated ATPase activity of each mutant 25-hep and 2-hep myosin pair. Raw rates are depicted in the left-hand boxes and 25-hep myosin rates normalized its mutant 2-hep myosin control are shown in the right-hand boxes. Data shown is for all technical replicates of the depicted representative biological replicate for each mutant 2-hep/25-hep pair. [file elife-76805-fig6-data1.xlsx]

## Sheet: Fig. 6,  ATPase
	D778V Biological Replicate 2
	Raw rates (Fig. S2B)												Normalized to Mut. 2-hep (Fig. 5B)
	[actin], uM				D778V 2-hep			D778V 25-hep					[actin], uM	D778V 2-hep			D778V 25-hep
	0				0.0409547	0.0419094	0.0414443	0.0266585	0.0274174	0.0292779			0	0.00554942	0.00567878	0.00561576	0.00361226	0.00371509	0.00396719
	75				7.5202	6.70257	6.93023	4.15912	4.85679	4.02203			75	1.019	0.908207	0.939056	0.563566	0.658102	0.544991
	5				2.53366	2.65851	2.612	1.09425	1.12656	0.989474			5	0.343314	0.360231	0.353929	0.148272	0.15265	0.134075
	35				5.93635	5.76744	6.08813	2.5459	2.76132	3.06242			35	0.804384	0.781496	0.824949	0.344973	0.374163	0.414963
	2.5				1.96524	2.31138	1.95814	0.828641	0.795349	0.870257			2.5	0.266293	0.313196	0.265331	0.112282	0.107771	0.117921
	55				5.96818	5.6328	6.13953	3.5716	3.64749				55	0.808696	0.763252	0.831915	0.483957	0.49424
	20				4.56059	4.58017	4.22766	1.99192	2.00563	2.0776			20	0.617966	0.620619	0.572854	0.269908	0.271766	0.281518
	10				3.66952	3.50306	3.75275	1.42228	1.4448	1.5339			10	0.497225	0.474669	0.508503	0.19272	0.195772	0.207846
	L781P Biological Replicate 2
	Raw rates (Fig. S2D)												Normalized to Mut. 2-hep (Fig. 5C)
	[actin], uM	WT 2-hep			L781P 2-hep			L781P 25-hep					[actin], uM	L781P 2-hep			L781P 25-hep
	0	0.149842	0.156286	0.159507	0.117814	0.112192	0.135565	0.0862287	0.104485	0.112129			0	0.025003	0.0238099	0.0287702	0.0182998	0.0221743	0.0237964
	80	4.8187	4.42198	4.56349	4.57865	4.73784	4.53316	3.26974	3.2091	3.3885			80	0.9717	1.00548	0.962047	0.693918	0.681048	0.719122
	5	1.75237	1.66646	1.75237	2.05407	1.99343	1.97498	0.985471	1.08427	0.995073			5	0.435924	0.423054	0.419139	0.209141	0.230108	0.211178
	40	3.33291	3.97726	3.87871	4.09097	3.87618	3.88882	2.67593	2.60265	2.78206			40	0.868202	0.82262	0.825301	0.567897	0.552346	0.59042
	2.5	1.31169	1.58307	1.6144	1.50954	1.45243	1.39987	0.777511	0.767151	0.777764			2.5	0.320361	0.308241	0.297087	0.165007	0.162808	0.16506
	60	4.36134	4.34365	4.13645	4.11623	4.24258	3.96968	3.15098	2.95389	2.9463			60	0.873564	0.900377	0.842461	0.668714	0.626886	0.625277
	25	3.60581	3.40114	3.44409	3.49716	3.36323	3.49463	2.24157	2.05357	2.188			25	0.742181	0.713759	0.741645	0.475714	0.435817	0.464346
	10	2.48541	2.38181	2.3439	2.61529	2.57233	2.51244	1.38168	1.44889	1.32836			10	0.555027	0.545911	0.533201	0.293226	0.30749	0.281911
	S782N Biological Replicate 2
	Raw rates (Fig. S2F)												Normalized to Mut. 2-hep (Fig. 5D)
	[actin], uM	WT 2-hep			S782N 2-hep			S782N 25-hep					[actin], uM	S782N 2-hep			S782N 25-hep
	0	0.0361333	0.03344	0.0331467	0.0382667	0.0449067	0.0424	0.0237067	0.0225147	0.0238453			0	0.00800558	0.0093947	0.00887029	0.00495955	0.00471018	0.00498856
	75		4.24		5.05867	4.30133	4.78133	3.2		3.50667			75	1.0583	0.899861	1.00028	0.669456		0.733612
	5	2.0784	1.4504	1.76613	1.85227	1.95067	1.776	0.758133	0.705333	0.8824			5	0.387503	0.408089	0.371548	0.158605	0.147559	0.184603
	35	3.50667	3.18933	3.48	3.512	3.672	3.14667	2.71467	2.10133	2.5048			35	0.734728	0.768201	0.658298	0.567922	0.439609	0.524017
	2.5	1.12507	1.07893	1.03173	1.1432	1.07093	1.24667	0.5336	0.552533	0.5616			2.5	0.239163	0.224045	0.260809	0.111632	0.115593	0.11749
	55	4.39467	4.072	4.16267	4.128	4.192	3.78933	2.53893	3.664	2.74933			55	0.863598	0.876987	0.792748	0.531158	0.766527	0.575174
	20	3.032	3.08	3.09867	3.57333	3.23733	3.61333	1.7728	1.82533	2.12667			20	0.747559	0.677266	0.755927	0.370879	0.381869	0.444909
	10	2.41573	2.43067	2.0392	2.4912	2.94933	2.752	1.26773	1.2048	1.25013			10	0.521172	0.617015	0.575732	0.265216	0.25205	0.261534
	A797T Biological Replicate 2
	Raw rates (Fig. S2H)												Normalized to Mut. 2-hep (Fig. 5E)
	[Actin], uM	WT 2-hep			A797T 2-hep			A797T 25-hep					[Actin], uM	A797T 2-hep			A797T 25-hep
	0	0.0922092	0.140448	0.11254	0.0851121	0.102721	0.107204	0.0925827	0.0757204	0.0759872			0	0.0175597	0.0211928	0.0221176	0.019101	0.0156221	0.0156772
	80	4.25827		4.39701	5.13981	4.97545		3.85486		4.41195			80	1.06041	1.0265		0.795308		0.910244
	5	1.16414	1.59509	1.65507	1.74536	1.82946	1.6826	1.06403	1.03842	1.06297			5	0.36009	0.377441	0.347143	0.219524	0.21424	0.219304
	40	3.66916	3.62006	3.52188		3.52188	3.37673	3.64995	3.26574				40		0.72661	0.696665	0.753032	0.673766
	2.5	0.947279	1.10608	0.821772	1.17375	1.16713	1.308	0.827962	0.618143	0.756884			2.5	0.242159	0.240794	0.269859	0.170819	0.127531	0.156155
	60	4.48026	4.68943	3.8207	4.24973	3.84632	3.76094	4.37353	3.68623	3.76948			60	0.876776	0.793546	0.775931	0.902317	0.760518	0.777693
	25	3.0715	3.04803	3.03522	3.01174	3.33831	2.77268	2.08602		2.44824			25	0.621362	0.688738	0.57204	0.430373		0.505104
	10	2.31377	2.23266	1.85784	2.06275	2.29242	2.39274	1.55069	1.30053	1.44632			10	0.425573	0.472957	0.493654	0.319929	0.268317	0.298394
	F834L Biological Replicate 2
	Raw rates (Fig. S2J)												Normalized to Mut. 2-hep (Fig. 5F)
	[actin], uM	WT 2-hep			F834L 2-hep			F834L 25-hep					[actin], uM	F834L 2-hep			F834L 25-hep
	0	0.168163	0.172439	0.129831	0.138332	0.105544	0.111035	0.092661	0.137804	0.0935058			0	0.0311979	0.0238033	0.0250417	0.0208978	0.0310788	0.0210884
	80	3.64942	4.40127	4.08237	4.15417	4.55333	3.98944	3.00106	2.99261	3.12566			80	0.93689	1.02691	0.899738	0.676828	0.674923	0.70493
	5	1.42936	1.44139	1.4925	1.53537	1.68807	1.37508	1.14192	1.29905	1.20824			5	0.346273	0.38071	0.310122	0.257538	0.292975	0.272494
	40	3.53537	3.55861	3.45723	3.34108	3.5227	3.53537	2.72017	2.71383	2.27878			40	0.753513	0.794475	0.797333	0.61348	0.612051	0.513932
	2.5	1.02936	1.50623	1.21098	1.10137	1.25723	1.12904	0.865048	0.852587	0.827244			2.5	0.248393	0.283544	0.254632	0.195094	0.192284	0.186568
	60	3.89229	4.01267	4.28089	3.3453	3.8226	3.43611	2.70539	2.85744	2.40549			60	0.754466	0.86211	0.774947	0.610146	0.644439	0.54251
	25	2.95459	2.81309	2.68849	2.78986	2.76241	2.74129	2.48152	2.43083	2.62091			25	0.629198	0.623006	0.618243	0.559657	0.548226	0.591093
	10	1.75797	1.99113	1.80971	1.93136	1.90264	1.79958	1.47772	1.44372	1.47202			10	0.43558	0.429102	0.405859	0.33327	0.325601	0.331984
	WT Biological Replicate 1
	Raw rates (Fig. S2K)												Normalized to WT 2-hep (Fig. 5A)
	[actin], uM	WT 2-hep			WT 25-hep								[actin], uM	WT 2-hep			WT 25-hep
	0	0.0886062	0.0769911	0.0818584	0.075719	0.0681416	0.141372						0	0.0163269	0.0141867	0.0150835	0.0139523	0.012556	0.0260497
	80	4.46018	4.5885	5.42035	2.71018	2.66593	3.31195						80	0.821849	0.845494	0.998775	0.499388	0.491234	0.610272
	2.5	1.0927	1.15863	0.998451	0.661947	0.510177	0.511062						2.5	0.201345	0.213493	0.183979	0.121973	0.0940072	0.0941703
	25	3.24115	3.26106	3.33628	1.43451	1.62389	1.71482						25	0.597227	0.600896	0.614756	0.264329	0.299225	0.31598
	1.25	0.748894	0.897124	0.790929	0.548894	0.395796	0.430752						1.25	0.137994	0.165308	0.14574	0.101141	0.072931	0.0793721
	50	4.2146	4.61504	4.08186	2.075	2.46681	2.25221						50	0.776599	0.850386	0.752139	0.382348	0.454545	0.415001
	10	2.02876	2.35619	2.34071	0.88385	0.893805	1.15509						10	0.373827	0.434162	0.431308	0.162862	0.164696	0.212841
	5	1.5365	1.45044	1.64093	0.59646	0.580973	0.644911						5	0.283122	0.267264	0.302364	0.109906	0.107052	0.118834
