# Supplementary material for: Hypertrophic cardiomyopathy mutations in the pliant and light chain-binding regions of the lever arm of human β-cardiac myosin have divergent effects on myosin function
Source: eLife. 2022 Jun 29;11:e76805. doi: 10.7554/eLife.76805 (PMC9242648; doi:10.7554/eLife.76805)
Supplement: Figure 7—figure supplement 1—source data 1. — Time (seconds) vs normalized fluorescence, where Y0=1.0 of the fitted curve and 0.0 corresponds to the plateau value of the fitted curve. Raw (non-normalized) fluorescence prior to normalization is also shown. [file elife-76805-fig7-figsupp1-data1.xlsx]

## Sheet: Fig. 7 - figure supplement 1
	Representative WT 25-hep curve				Representative D778V 25-hep curve				Representative L781P 25-hep curve				Representative S782N 25-hep curve				Representative A797T 25-hep curve				Representative F834L 25-hep curve
	Time (s)	Raw absorbance	Normalized (Fig. 6A)		Time (sec)	Raw absorbance	Normalized (Fig. 6B)		Time (s)	Raw absorbance	Normalized (Fig. 6C)		Time (s)	Raw absorbance	Normalized (Fig. 6D)		Time (s)	Raw absorbance	Normalized (Fig. 6E)		Time (s)	Raw absorbance	Normalized (Fig. 6F)
	21	26482	0.836013		12.12	52057	0.984399		18	13285	0.894852		14	53859	0.927073		18	37287	0.848203		19	19051	0.815348
	23	26395	0.829255		14.12	50803	0.939112		20.1	13026	0.854206		16	53823	0.925914		20.1	37157	0.840691		21	18893	0.797569
	25	26270	0.819545		16.12	49043	0.875551		22	12997	0.849655		18	53277	0.908342		22.3	37262	0.846758		23	18413	0.743558
	27	26017	0.799891		18.12	50803	0.939112		24	12881	0.83145		20	50859	0.830523		24.4	36396	0.796718		25	18326	0.733768
	29	25810	0.783811		20.12	49055	0.875984		26	12579	0.784055		22	52171	0.872747		26.5	36241	0.787761		27	18156	0.714639
	31	26091	0.80564		22.12	47898	0.8342		28	12447	0.76334		24	50946	0.833323		28.7	36131	0.781405		30.7	17887	0.68437
	33	25598	0.767342		24.12	47931	0.835392		30	12623	0.79096		26	49803	0.796537		30.8	35873	0.766497		32.3	17832	0.678182
	35	25711	0.776121		26.12	47924	0.835139		32	12537	0.777464		28	51454	0.849672		32.9	35774	0.760777		34	17735	0.667267
	37	25354	0.748388		28.12	47556	0.821849		34	12377	0.752354		30	51758	0.859455		35.1	35359	0.736796		35.6	17669	0.65984
	39	25272	0.742018		30.12	48263	0.847382		36	12216	0.727087		32	49683	0.792675		37.2	35186	0.7268		37.3	17577	0.649488
	41	25028	0.723064		32.12	47432	0.817371		38	12126	0.712963		34	50247	0.810826		39.3	34855	0.707674		39	17482	0.638798
	43	25092	0.728035		34.12	47751	0.828891		40	12065	0.70339		36	51054	0.836798		41.5	34602	0.693054		41	17552	0.646675
	45	24733	0.700148		36.12	46036	0.766956		42	12066	0.703547		38	48700	0.761039		43.6	34545	0.689761		43	17287	0.616856
	47	24882	0.711722		38.12	46429	0.781148		44	12126	0.712963		40	48951	0.769117		45.7	34331	0.677395		45	17254	0.613143
	49	24653	0.693933		40.12	46896	0.798014		46	12132	0.713905		42	48659	0.759719		47.9	34041	0.660638		47	17036	0.588613
	51	24758	0.70209		42.12	46273	0.775515		48	12014	0.695386		44	49397	0.783471		50	33818	0.647752		49	16931	0.576798
	53	24420	0.675833		44.12	45623	0.75204		50	12004	0.693817		46	49127	0.774781		52.1	33762	0.644516		51	16635	0.54349
	55	24412	0.675212		46.12	45829	0.75948		52.1	11792	0.660546		48	47329	0.716916		54.3	33791	0.646192		53	16486	0.526724
	57	24106	0.651441		48.12	45996	0.765511		54	11715	0.648462		50	47308	0.71624		56.4	33510	0.629955		55	16619	0.54169
	59	23984	0.641964		50.12	44524	0.712351		56	11670	0.6414		52	46783	0.699343		58.5	33225	0.613487		57	16426	0.519973
	61	23782	0.626272		52.12	45687	0.754352		58	11572	0.62602		54	47444	0.720617		60.7	33224	0.613429		59.1	16380	0.514797
	63	23873	0.633341		54.12	44069	0.695919		60	11543	0.621469		56	46332	0.684829		62.8	32675	0.581706		61	16396	0.516597
	65	23697	0.619669		56.12	45163	0.735428		62	11465	0.609228		58	45776	0.666935		64.9	32835	0.590951		63	16204	0.494993
	67	23694	0.619436		58.12	44195	0.700469		64	11612	0.632298		60	46744	0.698088		67.1	32615	0.578239		65	15987	0.470575
	69	23428	0.598773		60.12	44105	0.697219		66	11558	0.623823		62	46754	0.69841		69.2	32221	0.555472		67	15786	0.447958
	71	23480	0.602812		62.12	43758	0.684688		68	11444	0.605932		64	46699	0.69664		71.3	31954	0.540044		69	15876	0.458085
	73	23380	0.595044		64.12	43568	0.677826		70	11395	0.598242		66	45672	0.663588		73.5	31639	0.521842		71	15928	0.463936
	75	23513	0.605376		66.12	43381	0.671073		72	11305	0.584118		68	46052	0.675817		75.6	31622	0.52086		73	15618	0.429054
	77	23214	0.582149		68.12	43259	0.666667		74	11307	0.584432		70	45407	0.655059		77.8	31668	0.523518		75	15607	0.427816
	79	23176	0.579197		70.12	43780	0.685482		76	11385	0.596673		72	45310	0.651937		79.9	31541	0.516179		77	15418	0.406549
	81	23077	0.571506		72.12	43573	0.678007		78.1	11105	0.552731		74	44753	0.634011		82	31384	0.507107		79	15556	0.422077
	83	22542	0.529946		74.12	43461	0.673962		80	11305	0.584118		76	45169	0.6474		84.2	31245	0.499075		81	15346	0.398447
	85	22802	0.550144		76.12	43205	0.664717		82	10959	0.529818		78	44967	0.640899		86.3	31255	0.499653		83	15463	0.411612
	87	23008	0.566146		78.12	43218	0.665186		84	11121	0.555242		80	44164	0.615055		88.4	31231	0.498266		85	15120	0.373017
	89	22619	0.535928		80.12	42381	0.634958		86	10981	0.533271		82	43173	0.583162		90.6	30614	0.462614		87	15129	0.374029
	91	22456	0.523266		82.12	42618	0.643518		88	10843	0.511613		84	43097	0.580716		92.7	30413	0.451		89	15224	0.384719
	93	22602	0.534607		84.12	42025	0.622102		90.1	10819	0.507847		86	41822	0.539682		94.8	30724	0.46897		91	15091	0.369754
	95	22432	0.521401		86.12	41239	0.593716		92	10937	0.526365		88	42240	0.553135		97	30342	0.446897		93	14961	0.355125
	97	22357	0.515575		88.12	41049	0.586854		94	10815	0.507219		90	41712	0.536142		99.1	30076	0.431527		95.1	15021	0.361877
	99	22206	0.503845		90.12	40689	0.573853		96	10538	0.463748		92	43325	0.588054		101.2	30133	0.43482		97	14945	0.353325
	101	22293	0.510604		92.12	41550	0.604948		98	10703	0.489642		94	42764	0.569999		103.4	29884	0.420432		99	14576	0.311804
	103	22246	0.506953		94.12	41992	0.62091		100	10630	0.478186		96	41353	0.524588		105.5	30067	0.431007		101	14611	0.315742
	105	22085	0.494446		96.12	41204	0.592452		102	10717	0.491839		98	43172	0.58313		107.6	29575	0.402577		103	14675	0.322944
	107	22165	0.50066		98.12	40413	0.563886		104	10549	0.465474		100	42184	0.551332		109.8	29692	0.409338		105	14623	0.317092
	109	22003	0.488076		100.12	40263	0.558469		106	10709	0.490584		102	42421	0.55896		111.9	29335	0.388709		107	14545	0.308316
	111	21965	0.485124		102.12	40667	0.573059		108	10585	0.471124		104	42008	0.545668		114	29429	0.394141		109	14402	0.292225
	113	21775	0.470364		104.12	40506	0.567244		110	10436	0.44774		106	42376	0.557512		116.2	29189	0.380273		111	14426	0.294925
	115	21775	0.470364		106.12	39913	0.545829		112	10449	0.44978		108	41668	0.534726		118.3	28801	0.357853		113	14422	0.294475
	117	21830	0.474637		108.12	39535	0.532178		114	10450	0.449937		110	40856	0.508593		120.5	29107	0.375534		115	14361	0.287611
	119	21397	0.441001		110.12	39918	0.546009		116	10224	0.41447		112	41185	0.519181		122.6	29105	0.375419		117	14185	0.267807
	121	21368	0.438748		112.12	41081	0.58801		118.1	10399	0.441933		114	41888	0.541806		124.7	28940	0.365885		119	14417	0.293912
	123	21703	0.464771		114.12	39006	0.513073		120	10256	0.419492		116	41189	0.51931		126.9	28948	0.366347		121	14215	0.271183
	125	21413	0.442243		116.12	39937	0.546696		122	10192	0.409448		118	41755	0.537526		129	28690	0.351439		123.2	14056	0.253291
	127	21364	0.438437		118.12	39543	0.532467		124.1	10190	0.409134		120	40779	0.506115		131.1	28745	0.354617		125	14139	0.262631
	129	21283	0.432145		120.12	39772	0.540737		126	9976	0.375549		122	40512	0.497522		133.3	28537	0.342598		127	13949	0.241251
	131	21243	0.429038		122.12	38166	0.482737		128.1	10260	0.420119		124	39531	0.46595		135.4	28458	0.338033		129	13987	0.245527
	133	21218	0.427095		124.12	39245	0.521705		130	10252	0.418864		126	39400	0.461734		137.5	28406	0.335028		131	14100	0.258242
	135	21005	0.410549		126.12	38050	0.478548		132	10144	0.401915		128	40694	0.503379		139.7	28241	0.325494		133	13936	0.239788
	137	21259	0.43028		128.12	37714	0.466414		134	10113	0.39705		130	40394	0.493724		141.8	28242	0.325552		135	14033	0.250703
	139	21230	0.428028		130.12	37941	0.474612		136	10065	0.389517		132	39472	0.464051		143.9	27990	0.31099		137	13733	0.216946
	141	21087	0.416919		132.12	39073	0.515493		138.1	9965	0.373823		134	39397	0.461637		146.1	28160	0.320814		139	13801	0.224598
	143	21059	0.414744		134.12	38249	0.485735		140	9971	0.374765		136	40186	0.48703		148.2	27983	0.310586		141	13856	0.230787
	145	21120	0.419483		136.12	37983	0.476129		142.1	10070	0.390301		138	39202	0.455362		150.3	27897	0.305617		143	13795	0.223923
	147	21110	0.418706		138.12	38571	0.497364		144	9879	0.360326		140	39521	0.465628		152.5	27901	0.305848		145	13818	0.226511
	149	20890	0.401616		140.12	38343	0.48913		146	9997	0.378845		142	37580	0.40316		154.6	27557	0.28597		147.4	13717	0.215146
	151	20772	0.392449		142.12	37260	0.450018		148	10027	0.383553		144	39529	0.465886		156.7	27522	0.283948		149.1	13674	0.210307
	153	20686	0.385769		144.12	37223	0.448682		150.1	9942	0.370213		146	37782	0.409661		158.9	27619	0.289553		151	13702	0.213458
	155	20775	0.392682		146.12	37614	0.462802		152.1	9782	0.345104		148	38234	0.424208		161	27782	0.298971		153.5	13575	0.199167
	157	20670	0.384526		148.12	37673	0.464933		154	9881	0.36064		150	39011	0.449215		163.2	27433	0.278805		155.2	13747	0.218521
	159	20708	0.387478		150.12	35820	0.398014		156	9944	0.370527		152	37865	0.412333		165.3	27156	0.262799		157	13549	0.196242
	161	20648	0.382817		152.12	36964	0.439328		158.1	9686	0.330038		154	38325	0.427137		167.4	27199	0.265284		159	13596	0.20153
	163	20533	0.373883		154.12	36363	0.417624		160.1	9865	0.358129		156	38497	0.432673		169.6	27238	0.267537		161	13296	0.167773
	165	20498	0.371164		156.12	37047	0.442326		162.1	9798	0.347615		158	37439	0.398623		171.7	27250	0.268231		163	13412	0.180826
	167	20454	0.367746		158.12	36040	0.405959		164.1	9750	0.340082		160	38594	0.435794		173.8	27085	0.258696		165	13529	0.193991
	169	20606	0.379554		160.12	35731	0.3948		166	9725	0.336158		162	37884	0.412944		176	27070	0.25783		167	13218	0.158996
	171	20158	0.344753		162.12	36442	0.420477		168.1	9688	0.330352		164	36476	0.36763		178.1	26686	0.235641		169	13299	0.168111
	173	20300	0.355783		164.12	37224	0.448718		170	9865	0.358129		166	36283	0.361419		180.3	26939	0.25026		171	13168	0.15337
	175	20168	0.345529		166.12	36926	0.437956		172.1	9789	0.346202		168	36813	0.378476		182.4	26748	0.239223		173	13279	0.16586
	177	20003	0.332712		168.12	36827	0.434381		174	9692	0.330979		170	36584	0.371106		184.5	26732	0.238299		175	13342	0.172949
	179	20226	0.350035		170.12	34987	0.367931		176	9588	0.314658		172	37076	0.38694		186.7	26856	0.245464		177	13361	0.175087
	181	20119	0.341723		172.12	36607	0.426436		178.1	9612	0.318424		174	37354	0.395887		188.8	26900	0.248006		179	13458	0.186002
	183	20100	0.340247		174.12	35191	0.375298		180	9462	0.294884		176	36527	0.369271		190.9	26520	0.226049		181	13239	0.161359
	185	19934	0.327352		176.12	36668	0.428638		182.1	9501	0.301004		178	36038	0.353534		193.1	26656	0.233907		183	13373	0.176437
	187	19746	0.312748		178.12	36032	0.40567		184	9574	0.312461		180	36328	0.362867		195.2	26353	0.216399		185	13066	0.141893
	189	19881	0.323235		180.12	34798	0.361105		186	9486	0.29865		182	37353	0.395855		197.3	26483	0.223911		187	13025	0.137279
	191	19751	0.313136		182.12	36387	0.41849		188	9750	0.340082		184	36682	0.37426		199.5	26666	0.234485		189	13180	0.15472
	193	19928	0.326886		184.12	35999	0.404478		190	9583	0.313873		186	36320	0.362609		201.6	26368	0.217266		191	13078	0.143243
	195	20065	0.337528		186.12	35727	0.394655		192	9464	0.295198		188	35631	0.340435		203.8	26339	0.21559		193.1	13291	0.167211
	197	20066	0.337606		188.12	35119	0.372698		194	9317	0.272128		190	35776	0.345102		205.9	26307	0.213741		195	13176	0.15427
	199	19870	0.32238		190.12	34580	0.353232		196	9516	0.303358		192	35581	0.338826		208	26193	0.207154		197	13296	0.167773
	201	19837	0.319817		192.12	35843	0.398844		198.1	9474	0.296767		194	34927	0.317778		210.2	26033	0.197908		199	12863	0.11905
	203	19813	0.317952		194.12	35214	0.376129		200.1	9394	0.284212		196	36022	0.353019		212.3	25807	0.184849		201	13266	0.164397
	205	19436	0.288666		196.12	34670	0.356482		202	9280	0.266321		198	35396	0.332872		214.4	26224	0.208945		203	13169	0.153483
	207	19517	0.294958		198.12	35870	0.399819		204	9472	0.296453		200	34097	0.291066		216.6	26276	0.21195		205	13035	0.138404
	209	19668	0.306688		200.12	34200	0.339509		206.1	9336	0.27511		202	36162	0.357524		218.7	26429	0.22079		207	12922	0.125689
	211	19366	0.283228		202.12	35157	0.37407		208.1	9326	0.27354		204	35209	0.326854		220.9	26083	0.200797		209.1	13116	0.147519
	213	19645	0.304902		204.12	34065	0.334633		210.1	9294	0.268519		206	35861	0.347837		223	25771	0.182769		211	12930	0.126589
	215	19580	0.299852		206.12	34026	0.333225		212	9294	0.268519		208	35074	0.322509		225.1	26012	0.196695		213	12931	0.126702
	217	19395	0.285481		208.12	34841	0.362658		214	9384	0.282643		210	35098	0.323281		227.3	25581	0.17179		215	12952	0.129065
	219	19543	0.296978		210.12	33543	0.315782		216.1	9285	0.267106		212	35648	0.340982		229.4	25451	0.164278		217	12855	0.11815
	221	19409	0.286569		212.12	34619	0.354641		218	9286	0.267263		214	35208	0.326822		231.6	25661	0.176413		219	12932	0.126814
	223	19566	0.298765		214.12	34266	0.341892		220	9154	0.246547		216	36004	0.352439		233.7	25680	0.177511		221.1	12913	0.124676
	225	19453	0.289987		216.12	34187	0.339039		222	9273	0.265223		218	35151	0.324987		235.8	25716	0.179591		223.1	12919	0.125352
	227	19628	0.303581		218.12	33798	0.324991		224	9208	0.255022		220	34717	0.31102		238	25605	0.173177		225	12717	0.102622
	229	19144	0.265983		220.12	34458	0.348826		226	8928	0.21108		222	33808	0.281765		240.1	25463	0.164972		227	12728	0.10386
	231	19279	0.27647		222.12	34348	0.344854		228.1	9111	0.239799		224	35236	0.327723		242.2	25539	0.169363		229	12938	0.12749
	233	19287	0.277092		224.12	33057	0.29823		230.1	9110	0.239642		226	33209	0.262487		244.4	25589	0.172252		231	12773	0.108923
	235	19381	0.284394		226.12	34184	0.338931		232	9300	0.26946		228	34863	0.315718		246.5	25486	0.166301		233	12833	0.115675
	237	19250	0.274217		228.12	35436	0.384146		234	9020	0.225518		230	33748	0.279834		248.6	25320	0.156709		235	12792	0.111061
	239	19213	0.271343		230.12	33523	0.31506		236	9177	0.250157		232	33299	0.265384		250.8	25600	0.172888		237	12754	0.106785
	241	19427	0.287967		232.12	33458	0.312712		238.1	9021	0.225675		234	35129	0.324279		252.9	25418	0.162371		239	12807	0.112749
	243	19191	0.269634		234.12	33941	0.330155		240.1	9106	0.239014		236	33663	0.277098		255.1	25366	0.159367		241.7	12691	0.0996962
	245	19117	0.263886		236.12	33445	0.312243		242.1	9073	0.233836		238	34654	0.308992		257.2	25334	0.157518		243.4	12644	0.0944076
	247	19212	0.271265		238.12	33313	0.307476		244	9083	0.235405		240	34337	0.29879		259.4	25389	0.160696		245.1	12672	0.0975582
	249	18934	0.24967		240.12	33883	0.328061		246.1	8946	0.213905		242	33634	0.276165		261.5	25341	0.157922		247	12662	0.096433
	251	19121	0.264196		242.12	33238	0.304767		248.1	9116	0.240584		244	34394	0.300624		263.6	25204	0.150006		249.5	12583	0.0875436
	253	19136	0.265362		244.12	33503	0.314337		250.1	9046	0.229598		246	33263	0.264225		265.8	25209	0.150295		251.1	12595	0.0888939
	255	18938	0.249981		246.12	32803	0.289057		252.1	8964	0.216729		248	33697	0.278193		267.9	25226	0.151277		253.1	12784	0.110161
	257	19158	0.267071		248.12	32945	0.294186		254.1	8994	0.221438		250	32738	0.247329		270	25095	0.143707		255.1	12495	0.0776415
	259	18944	0.250447		250.12	33088	0.29935		256	8950	0.214532		252	32306	0.233426		272.2	25064	0.141916		257	12538	0.08248
	261	18768	0.236775		252.12	33642	0.319357		258.1	9078	0.23462		254	34421	0.301493		274.3	25262	0.153357		259	12514	0.0797795
	263	18795	0.238872		254.12	32062	0.262297		260.1	8854	0.199466		256	32637	0.244078		276.5	25463	0.164972		261	12701	0.100821
	265	18973	0.252699		256.12	31630	0.246696		262	8972	0.217985		258	31865	0.219233		278.6	24989	0.137582		263	12599	0.089344
	267	19090	0.261788		258.12	32231	0.2684		264.1	8973	0.218142		260	32894	0.252349		280.7	25074	0.142494		265	12669	0.0972207
	269	18694	0.231026		260.12	32053	0.261972		266	8800	0.190992		262	33037	0.256952		282.9	25121	0.14521		267	12488	0.0768538
	271	18906	0.247495		262.12	32194	0.267064		268	8940	0.212963		264	32952	0.254216		285.1	24851	0.129608		269	12596	0.0890064
	273	18945	0.250524		264.12	32969	0.295052		270.1	8973	0.218142		266	32724	0.246878		287.2	24975	0.136773		271	12571	0.0861933
	275	18835	0.241979		266.12	33064	0.298483		272	8857	0.199937		268	33086	0.258529		289.3	24585	0.114238		273	12761	0.107573
	277	18728	0.233667		268.12	31949	0.258216		274.1	8905	0.20747		270	33588	0.274685		291.5	24677	0.119554		275	12712	0.102059
	279	18808	0.239882		270.12	31922	0.257241		276	8679	0.172003		272	33370	0.267669		293.6	25052	0.141223		277	12615	0.0911444
	281	18679	0.229861		272.12	32836	0.290249		278.1	8726	0.179379		274	33175	0.261393		295.8	24914	0.133249		280	12716	0.102509
	283	18959	0.251612		274.12	32302	0.270964		280.1	8896	0.206058		276	31691	0.213633		297.9	24916	0.133364		281.7	12461	0.0738157
	285	18837	0.242135		276.12	32338	0.272264		282.1	8877	0.203076		278	32743	0.24749		300	24937	0.134578		283.3	12505	0.0787667
	287	18747	0.235143		278.12	31045	0.225569		284	8764	0.185342		280	32695	0.245945		302.2	24899	0.132382		285	12602	0.0896816
	289	18699	0.231415		280.12	33018	0.296822		286.1	8797	0.190521		282	31983	0.22303		304.3	24466	0.107362		287	12369	0.0634635
	291	18700	0.231492		282.12	32067	0.262477		288.1	8903	0.207156		284	31793	0.216916		306.5	24712	0.121576		289	12496	0.077754
	293	18546	0.219529		284.12	31315	0.23532		290.1	8826	0.195072		286	32175	0.22921		308.6	24839	0.128915		291	12629	0.0927197
	295	18814	0.240348		286.12	31960	0.258613		292	8798	0.190678		288	31918	0.220938		310.8	24520	0.110482		293	12634	0.0932823
	297	18649	0.22753		288.12	32082	0.263019		294	8968	0.217357		290	32066	0.225702		312.9	24549	0.112158		295	12468	0.0746034
	299	18762	0.236309		290.12	31969	0.258938		296.1	8918	0.20951		292	32044	0.224994		315	24413	0.104299		297	12525	0.0810172
	301	18734	0.234133		292.12	32237	0.268617		298.1	8718	0.178123		294	30809	0.185247		317.2	24900	0.13244		299.1	12514	0.0797795
	303	18724	0.233357		294.12	32040	0.261502		300.1	8900	0.206685		296	31547	0.208998		319.3	24477	0.107997		301	12572	0.0863058
	305	18684	0.230249		296.12	31678	0.248429		302.1	8838	0.196955		298	32406	0.236644		321.4	24621	0.116318		303.3	12491	0.0771914
	307	18552	0.219995		298.12	31311	0.235175		304.1	8778	0.187539		300	32356	0.235035		323.6	24629	0.11678		305	12454	0.073028
	309	18745	0.234988		300.12	30976	0.223077		306.1	8895	0.205901		302	32369	0.235453		325.7	24293	0.0973651		307	12386	0.0653764
	311	18404	0.208498		302.12	31509	0.242326		308.1	8760	0.184714		304	32445	0.237899		327.8	24481	0.108228		309.4	12453	0.0729155
	313	18615	0.224889		304.12	32533	0.279307		310.1	8919	0.209667		306	30747	0.183252		330	24433	0.105455		311.1	12443	0.0717903
	315	18588	0.222792		306.12	32050	0.261863		312.1	8782	0.188167		308	31569	0.209706		332.1	24352	0.100774		313.1	12459	0.0735906
	317	18414	0.209275		308.12	32020	0.26078		314.1	8684	0.172787		310	32232	0.231044		334.2	24549	0.112158		315	12511	0.0794419
	319	18316	0.201662		310.12	31496	0.241856		316.1	8656	0.168393		312	32696	0.245977		336.4	24358	0.101121		317	12393	0.0661641
	321	18396	0.207877		312.12	32161	0.265872		318.1	8555	0.152542		314	31026	0.192231		338.5	24339	0.100023		319.1	12496	0.077754
	323	18578	0.222015		314.12	30734	0.214337		320.1	8777	0.187382		316	31663	0.212732		340.7	24571	0.113429		321	12459	0.0735906
	325	18300	0.200419		316.12	31063	0.226219		322.1	8747	0.182674		318	30740	0.183027		342.8	24125	0.0876575		323	12269	0.0522111
	327	18472	0.213781		318.12	30440	0.20372		324.1	8560	0.153327		320	32638	0.24411		345	24601	0.115162		325.5	12296	0.0552492
	329	18372	0.206013		320.12	30438	0.203648		326.1	8656	0.168393		322	31580	0.210061		347.1	24281	0.0966717		327.1	12468	0.0746034
	331	18049	0.180921		322.12	30459	0.204406		328.1	8728	0.179692		324	30843	0.186341		349.2	24448	0.106322		329.1	12222	0.0469225
	333	18441	0.211373		324.12	31518	0.242651		330.1	8661	0.169178		326	31413	0.204686		351.4	24405	0.103837		331.1	12289	0.0544616
	335	18202	0.192807		326.12	31215	0.231708		332.1	8579	0.156309		328	31388	0.203881		353.5	24407	0.103952		333	12254	0.0505232
	337	18374	0.206168		328.12	30696	0.212965		334	8556	0.152699		330	30732	0.182769		355.6	24326	0.0992719		335.1	12315	0.0573872
	339	18224	0.194516		330.12	30763	0.215385		336.1	8531	0.148776		332	30348	0.170411		357.8	24065	0.0841905		337	12413	0.0684145
	341	18249	0.196458		332.12	31537	0.243337		338.1	8535	0.149404		334	31163	0.19664		359.9	24376	0.102161		339.1	12430	0.0703274
	343	18179	0.19102		334.12	30616	0.210076		340.1	8629	0.164156		336	30121	0.163105		362	24288	0.0970762		341	12135	0.0371329
	345	18298	0.200264		336.12	31149	0.229325		342.1	8751	0.183302		338	31584	0.210189		364.2	24294	0.0974229		343.1	12287	0.0542365
	347	18199	0.192574		338.12	30468	0.204731		344.1	8613	0.161645		340	29864	0.154834		366.3	24278	0.0964983		345	12297	0.0553618
	349	18120	0.186437		340.12	30149	0.193211		346.1	8392	0.126962		342	30001	0.159243		368.4	24015	0.0813013		347.4	12355	0.0618882
	351	17977	0.175328		342.12	31000	0.223944		348.1	8521	0.147207		344	30665	0.180613		370.6	24106	0.0865596		349.1	12390	0.0658265
	353	18064	0.182087		344.12	30022	0.188624		350.1	8392	0.126962		346	30530	0.176268		372.7	24370	0.101814		351.1	12401	0.0670643
	355	18015	0.17828		346.12	30272	0.197653		352	8596	0.158977		348	29548	0.144664		374.9	24372	0.10193		353	12305	0.056262
	357	17763	0.158704		348.12	30949	0.222102		354.1	8366	0.122881		350	30663	0.180548		377	24269	0.0959783		355	12409	0.0679644
	359	18075	0.182941		350.12	31303	0.234886		356.1	8517	0.146579		352	29469	0.142122		379.2	24101	0.0862707		357.1	12309	0.0567121
	361	18053	0.181232		352.12	29403	0.166269		358.1	8354	0.120998		354	30486	0.174852		381.3	24269	0.0959783		359.1	12407	0.0677394
	363	17834	0.16422		354.12	30644	0.211087		360.1	8411	0.129944		356	30186	0.165197		383.4	23941	0.0770253		361.3	12366	0.0631259
	365	17946	0.17292		356.12	31038	0.225316		362.1	8385	0.125863		358	31050	0.193003		385.6	23876	0.0732694		363.1	12469	0.0747159
	367	17983	0.175794		358.12	29739	0.178404		364.1	8541	0.150345		360	30353	0.170572		387.7	24081	0.085115		365	12304	0.0561494
	369	17913	0.170357		360.12	30078	0.190646		366.1	8428	0.132611		362	28802	0.120655		389.9	24005	0.0807234		367	12540	0.0827051
	371	17724	0.155675		362.12	29829	0.181654		368.1	8481	0.140929		364	30742	0.183091		392	24193	0.0915867		369	12448	0.0723529
	373	18030	0.179445		364.12	29805	0.180787		370.1	8400	0.128217		366	29828	0.153675		394.2	23762	0.0666821		371.1	12221	0.0468099
	375	18277	0.198633		366.12	29382	0.165511		372.1	8429	0.132768		368	30582	0.177942		396.3	23936	0.0767364		373.1	12241	0.0490604
	377	17905	0.169735		368.12	29910	0.184579		374.1	8460	0.137633		370	29260	0.135395		398.4	23828	0.0704958		375.1	12211	0.0456847
	379	17716	0.155053		370.12	29895	0.184038		376.1	8330	0.117232		372	30038	0.160434		400.6	24182	0.0909511		377	12354	0.0617756
	381	18068	0.182397		372.12	30068	0.190285		378.1	8200	0.0968299		374	29993	0.158986		402.7	24025	0.0818791		379	12202	0.044672
	383	18006	0.177581		374.12	29811	0.181004		380.1	8431	0.133082		376	29288	0.136296		404.9	23809	0.0693979		381.1	12386	0.0653764
	385	17978	0.175406		376.12	30458	0.20437		382.1	8429	0.132768		378	29140	0.131533		407	23876	0.0732694		383.1	12353	0.0616631
	387	17610	0.146819		378.12	30205	0.195233		384.1	8574	0.155524		380	30762	0.183735		409.2	23963	0.0782965		385.1	12340	0.0602003
	389	17803	0.161812		380.12	29522	0.170567		386.1	8381	0.125235		382	30243	0.167031		411.3	23909	0.0751762		387.1	12301	0.0558119
	391	17892	0.168725		382.12	29757	0.179054		388.7	8499	0.143754		384	30980	0.190751		413.5	23774	0.0673755		389.1	12197	0.0441094
	393	18029	0.179368		384.12	30220	0.195775		390.4	8423	0.131827		386	31213	0.198249		415.6	23903	0.0748295		391	12258	0.0509733
	395	17729	0.156063		386.12	29588	0.172951		392.2	8432	0.133239		388	29813	0.153193		417.8	23714	0.0639085		393.1	12204	0.044897
	397	17679	0.152179		388.12	30311	0.199061		394.1	8305	0.113308		390	30035	0.160337		419.9	23831	0.0706691		395.1	12292	0.0547991
	399	17874	0.167327		390.12	29836	0.181907		396.1	8250	0.104677		392	30341	0.170185		422.1	23940	0.0769675		397.1	12434	0.0707775
	401	17929	0.171599		392.12	29687	0.176526		398.1	8307	0.113622		394	30409	0.172374		424.2	23747	0.0658153		399.1	12360	0.0624508
	403	17883	0.168026		394.12	28428	0.131058		400.1	8290	0.110954		396	30170	0.164682		426.4	23602	0.0574367		401.1	12232	0.0480477
	405	17626	0.148062		396.12	28907	0.148357		402.1	8369	0.123352		398	28794	0.120398		428.5	23706	0.0634462		403.1	12245	0.0495105
	407	17654	0.150237		398.12	30171	0.194005		404.1	8323	0.116133		400	28469	0.109938		430.6	23949	0.0774876		405.1	12197	0.0441094
	409	17664	0.151014		400.12	29639	0.174792		406.1	8281	0.109542		402	29937	0.157183		432.8	23820	0.0700335		407.1	12167	0.0407337
	411	17712	0.154742		402.12	28752	0.142759		408.1	8310	0.114093		404	29826	0.153611		434.9	23805	0.0691668		409.1	12225	0.04726
	413	17559	0.142857		404.12	30259	0.197183		410.1	8251	0.104834		406	29650	0.147947		437.1	23726	0.0646019		411.1	12298	0.0554743
	415	17610	0.146819		406.12	28943	0.149657		412.1	8216	0.0993409		408	28674	0.116536		439.2	23926	0.0761586		413.1	12213	0.0459098
	417	17846	0.165152		408.12	28496	0.133514		414.1	8368	0.123195		410	29529	0.144053		441.3	23749	0.0659309		415.1	12110	0.0343198
	419	17474	0.136254		410.12	28458	0.132142		416.1	8405	0.129002		412	29742	0.150908		443.5	23816	0.0698024		417.1	12175	0.0416338
	421	17508	0.138895		412.12	29561	0.171975		418.1	8208	0.0980854		414	29034	0.128122		445.6	23876	0.0732694		419.1	12165	0.0405086
	423	17560	0.142935		414.12	29396	0.166017		420.1	8330	0.117232		416	29616	0.146852		447.8	23900	0.0746562		421.1	12062	0.0289186
	425	17690	0.153033		416.12	29630	0.174467		422.1	8300	0.112524		418	28800	0.120591		449.9	23699	0.0630417		423	12214	0.0460223
	427	17707	0.154354		418.12	28342	0.127952		424.1	8177	0.0932203		420	28371	0.106784		452.1	23679	0.0618861		425.1	12251	0.0501857
	429	17608	0.146664		420.12	28991	0.15139		426.1	8130	0.0858443		422	29057	0.128862		454.2	23371	0.0440888		427.1	12170	0.0410712
	431	17704	0.154121		422.12	28751	0.142723		428.1	8310	0.114093		424	28582	0.113575		456.4	23837	0.0710158		429.1	12197	0.0441094
	433	17748	0.157539		424.12	28714	0.141387		430.1	8310	0.114093		426	29277	0.135942		458.5	23905	0.0749451		431.1	12074	0.0302689
	435	17301	0.122815		426.12	28993	0.151463		432.1	8217	0.0994978		428	29406	0.140094		460.7	23697	0.0629262		433.1	12292	0.0547991
	437	17621	0.147673		428.12	28933	0.149296		434.1	8257	0.105775		430	29910	0.156314		462.8	23665	0.0610771		435	12214	0.0460223
	439	17538	0.141226		430.12	28816	0.14507		436.1	8371	0.123666		432	28206	0.101474		465	23840	0.0711892		437.1	12147	0.0384832
	441	17466	0.135633		432.12	29173	0.157963		438.1	8281	0.109542		434	29003	0.127124		467.1	23803	0.0690512		439	12152	0.0390458
	443	17681	0.152334		434.12	29265	0.161286		440.1	8315	0.114878		436	29603	0.146434		469.3	23690	0.0625217		441.1	12089	0.0319568
	445	17539	0.141304		436.12	28690	0.14052		442.1	8282	0.109699		438	29769	0.151777		471.4	23774	0.0673755		443	12139	0.037583
	447	17592	0.145421		438.12	28997	0.151607		444.1	8296	0.111896		440	28772	0.11969		473.5	23757	0.0663932		445.1	12097	0.032857
	449	17559	0.142857		440.12	28257	0.124883		446.1	8213	0.0988701		442	28961	0.125772		475.7	23804	0.069109		447.1	12071	0.0299314
	451	17418	0.131904		442.12	28726	0.14182		448.1	8267	0.107345		444	28669	0.116375		477.8	23838	0.0710736		449.1	12258	0.0509733
	453	17593	0.145498		444.12	29064	0.154027		450.1	8251	0.104834		446	28301	0.104531		480	23564	0.055241		451.1	12146	0.0383707
	455	17369	0.128098		446.12	29500	0.169772		452.1	8158	0.0902385		448	29610	0.146659		482.1	23720	0.0642552		453.1	12121	0.0355576
	457	17573	0.143945		448.12	27941	0.113471		454.1	8362	0.122254		450	29584	0.145823		484.3	23724	0.0644863		455.1	12112	0.0345448
	459	17599	0.145964		450.12	29067	0.154135		456.1	8336	0.118173		452	28764	0.119432		486.4	23639	0.0595747		457.1	12172	0.0412963
	461	17372	0.128331		452.12	28533	0.13485		458.1	8270	0.107815		454	28543	0.11232		488.5	23957	0.0779498		459.1	12154	0.0392708
	463	17630	0.148373		454.12	27890	0.111629		460.1	8156	0.0899247		456	28785	0.120108		490.7	23685	0.0622328		461.1	12060	0.0286936
	465	17382	0.129107		456.12	27702	0.104839		462.1	8259	0.106089		458	28292	0.104242		492.8	23768	0.0670288		463.1	12276	0.0529988
	467	17407	0.131049		458.12	28036	0.116901		464.1	8156	0.0899247		460	28614	0.114605		495	23578	0.0560499		465.1	12394	0.0662766
	469	17195	0.114581		460.12	27916	0.112568		466.1	8290	0.110954		462	27321	0.0729918		497.1	23583	0.0563388		467.1	12226	0.0473726
	471	17605	0.146431		462.12	28405	0.130228		468.1	8076	0.0773697		464	29074	0.129409		499.3	23636	0.0594014		469.1	12100	0.0331946
	473	17310	0.123514		464.12	28467	0.132467		470.1	8205	0.0976146		466	29288	0.136296		501.4	23554	0.0546631		471.1	11762	-0.00483853
	475	17306	0.123204		466.12	27869	0.11087		472.1	8196	0.0962021		468	27905	0.0917868		503.6	23488	0.0508494		473.1	12103	0.0335321
	477.1	17365	0.127787		468.12	28477	0.132828		474.1	8144	0.0880414		470	29077	0.129506		505.7	23483	0.0505605		475.1	12314	0.0572747
	479	17303	0.122971		470.12	29400	0.166161		476.1	8320	0.115662		472	28205	0.101442		507.8	23732	0.0649486		477.1	12075	0.0303815
	481	17201	0.115047		472.12	28334	0.127663		478.1	8108	0.0823917		474	28919	0.124421		510	23593	0.0569167		479.1	12182	0.0424215
	483	17335	0.125456		474.12	28839	0.145901		480.1	8162	0.0908663		476	29030	0.127993		512.1	23505	0.0518317		481.1	12175	0.0416338
	485	17331	0.125146		476.12	29187	0.158469		482.1	8081	0.0781544		478	28316	0.105014		514.3	23427	0.0473246		483.1	12010	0.0230674
	487	16949	0.0954711		478.12	29276	0.161683		484.1	8047	0.0728186		480	28747	0.118885		516.4	23941	0.0770253		485.1	12100	0.0331946
	489	17237	0.117844		480.12	28716	0.141459		486.1	8070	0.0764281		482	27537	0.0799434		518.6	23543	0.0540275		487.1	12080	0.0309441
	491	17126	0.109221		482.12	28568	0.136114		488.1	7972	0.0610483		484	28535	0.112062		520.7	23372	0.0441465		489.1	12042	0.0266682
	493	17279	0.121106		484.12	27020	0.0802095		490.1	8007	0.0665411		486	27728	0.0860904		522.9	23494	0.0511961		491.1	12091	0.0321818
	495	17047	0.103084		486.12	27234	0.0879379		492.1	8182	0.094005		488	28996	0.126899		525	23584	0.0563966		493.1	12074	0.0302689
	497.1	17112	0.108133		488.12	27511	0.0979415		494.1	8044	0.0723478		490	28398	0.107653		527.1	23404	0.0459956		495.1	12156	0.0394959
	499	17142	0.110464		490.12	28431	0.131166		496.1	8038	0.0714062		492	27436	0.0766928		529.3	23451	0.0487114		497.1	12291	0.0546866
	501.1	16988	0.0985007		492.12	28242	0.124341		498.1	8184	0.0943189		494	27783	0.0878605		531.4	23463	0.0494048		499.1	12109	0.0342073
	503	17102	0.107356		494.12	29465	0.168508		500.1	8160	0.0905524		496	28065	0.0969361		533.6	23386	0.0449555		501.1	12117	0.0351075
	505	17367	0.127942		496.12	28436	0.131347		502.1	8087	0.079096		498	28214	0.101731		535.7	23327	0.0415463		503.1	12000	0.0219422
	507.1	16992	0.0988115		498.12	27948	0.113723		504.1	8017	0.0681105		500	28435	0.108844		537.9	23601	0.0573789		505.1	12242	0.0491729
	509	17150	0.111085		500.12	27414	0.0944384		506.1	8133	0.0863151		502	27969	0.0938465		540	23263	0.0378481		507.1	12130	0.0365703
	511	16958	0.0961703		502.12	28064	0.117913		508.1	8106	0.0820778		504	28368	0.106688		542.2	23238	0.0364036		509.1	12115	0.0348824
	513	17066	0.10456		504.12	28267	0.125244		510.1	8064	0.0754865		506	27674	0.0843525		544.3	23624	0.058708		511.1	12057	0.028356
	515	17149	0.111008		506.12	28003	0.11571		512.1	7970	0.0607345		508	27540	0.0800399		546.5	23517	0.0525251		513.1	12108	0.0340947
	517	17106	0.107667		508.12	27289	0.0899242		514.1	8017	0.0681105		510	28738	0.118596		548.6	23375	0.0443199		515.1	12058	0.0284685
	519	16998	0.0992776		510.12	27706	0.104984		516.1	8079	0.0778406		512	27929	0.0925592		550.8	23542	0.0539697		517.1	12229	0.0477101
	521	16971	0.0971801		512.12	26949	0.0776454		518.1	8123	0.0847458		514	27423	0.0762745		552.9	23280	0.0388305		519.1	12132	0.0367953
	523	17226	0.116989		514.12	26958	0.0779704		520.1	8116	0.0836472		516	27699	0.0851571		555.1	23371	0.0440888		521.1	11981	0.0198042
	525	17149	0.111008		516.12	27963	0.114265		522.1	8177	0.0932203		518	28325	0.105304		557.2	23330	0.0417196		523.1	12059	0.0285811
	527	17176	0.113105		518.12	28343	0.127988		524.1	8202	0.0971438		520	28013	0.0952626		559.4	23400	0.0457645		525.1	12061	0.0288061
	529	16957	0.0960926		520.12	28202	0.122896		526.1	8066	0.0758004		522	28466	0.109842		561.5	23382	0.0447244		527.1	11892	0.00978958
	531	17192	0.114348		522.12	27682	0.104117		528.1	8020	0.0685813		524	27775	0.087603		563.7	23503	0.0517162		529.1	11996	0.0214921
	533	17084	0.105958		524.12	28768	0.143337		530.1	8098	0.0808223		526	27269	0.0713182		565.8	23526	0.0530452		531.1	12127	0.0362327
	535	17131	0.109609		526.12	27009	0.0798122		532.1	8074	0.0770559		528	28093	0.0978373		568	23563	0.0551832		533.1	11952	0.016541
	537.1	16773	0.0817991		528.12	27572	0.100144		534.1	8068	0.0761142		530	27984	0.0943293		570.1	23198	0.0340922		535.1	12200	0.0444469
	539	17021	0.101064		530.12	28655	0.139256		536.1	8087	0.079096		532	28088	0.0976764		572.3	23246	0.0368658		537.1	12186	0.0428716
	541	16818	0.0852948		532.12	29177	0.158108		538.1	7979	0.0621469		534	28390	0.107396		574.4	23408	0.0462267		539.1	11977	0.0193541
	543	16905	0.0920531		534.12	27335	0.0915854		540.1	7983	0.0627746		536	27914	0.0920765		576.6	23440	0.0480758		541.2	12135	0.0371329
	545	16921	0.093296		536.12	28290	0.126074		542.1	8022	0.0688952		538	26741	0.0543254		578.7	23283	0.0390038		543.1	11920	0.0129402
	547	16854	0.0880914		538.12	27605	0.101336		544.1	7870	0.0450408		540	27192	0.0688401		580.9	23183	0.0332255		545.1	12214	0.0460223
	549	17055	0.103705		540.12	26986	0.0789816		546.1	8009	0.066855		542	28133	0.0991246		583	23439	0.048018		547.1	12195	0.0438843
	551.1	16808	0.084518		542.12	27035	0.0807512		548.1	7874	0.0456685		544	27678	0.0844812		585.1	23384	0.0448399		549.1	12013	0.023405
	553	16747	0.0797794		544.12	26670	0.0675695		550.1	8088	0.079253		546	26629	0.0507209		587.3	23470	0.0498093		551.1	12040	0.0264431
	555.1	16701	0.076206		546.12	28333	0.127627		552.1	7952	0.0579096		548	28416	0.108232		589.4	23375	0.0443199		553.1	12152	0.0390458
	557.1	17027	0.10153		548.12	28295	0.126255		554.1	8076	0.0773697		550	27542	0.0801043		591.6	23236	0.036288		555.1	11917	0.0126027
	559	16901	0.0917424		550.12	27257	0.0887685		556.1	7952	0.0579096		552	28557	0.11277		593.7	23364	0.0436843		557.1	12132	0.0367953
	561.1	16821	0.0855278		552.12	27887	0.11152		558.1	7874	0.0456685		554	28946	0.12529		595.8	23392	0.0453022		559.1	11984	0.0201418
	563	16949	0.0954711		554.12	27800	0.108378		560.1	7830	0.0387633		556	27398	0.0754699		598	23403	0.0459378		561.1	12242	0.0491729
	565	16786	0.082809		556.12	26955	0.077862		562.1	8001	0.0655995		558	27135	0.0670057		600.1	23494	0.0511961		563.1	11880	0.00843929
	567.1	16959	0.096248		558.12	27969	0.114482		564.1	8008	0.0666981		560	27127	0.0667482		602.3	23132	0.0302785		565.1	12018	0.0239676
	569	16873	0.0895673		560.12	27549	0.0993138		566.1	8101	0.0812932		562	26867	0.0583805		604.4	23323	0.0413152		567.1	11984	0.0201418
	571	16833	0.08646		562.12	28174	0.121885		568.1	7943	0.0564972		564	27217	0.0696447		606.6	23005	0.02294		569.1	11970	0.0185664
	573.1	17062	0.104249		564.12	27732	0.105923		570.1	8114	0.0833333		566	25020	-0.00106205		608.7	23289	0.0393505		571.1	11965	0.0180038
	575	16875	0.0897227		566.12	27099	0.0830625		572.1	8005	0.0662272		568	27323	0.0730561		610.9	23162	0.032012		573.1	11987	0.0204794
	577.1	16845	0.0873922		568.12	27301	0.0903575		574.1	7868	0.0447269		570	27320	0.0729596		613	23119	0.0295273		575.1	12215	0.0461348
	579.1	16761	0.0808669		570.12	27039	0.0808956		576.1	8070	0.0764281		572	27233	0.0701596		615.2	23196	0.0339767		577.2	11937	0.0148532
	581	16811	0.084751		572.12	27635	0.10242		578.1	7926	0.0538293		574	27623	0.0827111		617.3	23492	0.0510806		579.1	11856	0.00573872
	583.1	16961	0.0964033		574.12	26783	0.0716504		580.1	7934	0.0550847		576	28137	0.0992533		619.5	23356	0.043222		581.1	11959	0.0173287
	585	17090	0.106424		576.12	28234	0.124052		582.1	7901	0.0499058		578	27159	0.0677781		621.6	23400	0.0457645		583.1	12186	0.0428716
	587.1	16827	0.0859939		578.12	26286	0.0537017		584.1	7976	0.0616761		580	26971	0.0617276		623.8	23213	0.034959		585.1	11905	0.0112524
	589.1	17002	0.0995883		580.12	27871	0.110943		586.1	7944	0.0566541		582	26714	0.0534565		625.9	23298	0.0398706		587.1	12145	0.0382581
	591.1	16838	0.0868484		582.12	27642	0.102672		588.1	7938	0.0557125		584	27092	0.0656218		628.1	23164	0.0321276		589.1	12128	0.0363452
	593.1	16737	0.0790026		584.12	28181	0.122138		590.1	7975	0.0615191		586	27017	0.063208		630.2	23256	0.0374437		591.1	12038	0.0262181
	595.1	16788	0.0829643		586.12	27416	0.0945107		592.1	7855	0.0426868		588	27856	0.0902098		632.4	23418	0.0468046		593.1	12080	0.0309441
	597.1	16756	0.0804785		588.12	27948	0.113723		594.1	8007	0.0665411		590	26685	0.0525232		634.5	23324	0.0413729		595.1	12063	0.0290312
	599.1	16780	0.0823429		590.12	26798	0.0721921		596.1	7878	0.0462963		592	27889	0.0912719		636.7	23156	0.0316653		597.1	12017	0.0238551
	601.1	17042	0.102696		592.12	26808	0.0725533		598.1	7868	0.0447269		594	27877	0.0908857		638.8	23213	0.034959		599.1	11920	0.0129402
	603.1	16627	0.0704575		594.12	27677	0.103936		600.1	8029	0.0699937		596	27197	0.069001		641	23110	0.0290073		601.1	12058	0.0284685
	605.1	16759	0.0807116		596.12	26128	0.0479957		602.1	7962	0.059479		598	27195	0.0689367		643.2	23321	0.0411996		603.1	11965	0.0180038
	607.1	16719	0.0776043		598.12	27850	0.110184		604.1	7981	0.0624608		600	26990	0.0623391		645.3	23215	0.0350745		605.1	11954	0.0167661
	609.1	16712	0.0770605		600.12	26901	0.0759119		606.1	8028	0.0698368		602	26940	0.0607299		647.5	23382	0.0447244		607.1	12156	0.0394959
	611.1	16541	0.0637769		602.12	26382	0.0571687		608.1	7979	0.0621469		604	27397	0.0754377		649.6	23121	0.0296429		609.1	12110	0.0343198
	613.1	16551	0.0645537		604.12	27175	0.0858072		610.1	7946	0.056968		606	25810	0.0243628		651.8	23320	0.0411418		611.1	12057	0.028356
	615.1	16516	0.0618348		606.12	26439	0.0592272		612.1	8002	0.0657564		608	26928	0.0603437		653.9	23319	0.041084		613.1	12046	0.0271183
	617.1	16616	0.069603		608.12	26399	0.0577826		614.1	7928	0.0541431		610	27641	0.0832904		656.1	23596	0.05709		615.1	12056	0.0282435
	619	16786	0.082809		610.12	27042	0.081004		616.1	7842	0.0406466		612	25942	0.028611		658.2	23387	0.0450133		617.1	12028	0.0250928
	621	16809	0.0845957		612.12	27236	0.0880101		618.1	7942	0.0563402		614	27211	0.0694516		660.3	23326	0.0414885		619.1	12035	0.0258805
	623	16709	0.0768275		614.12	26274	0.0532683		620.1	7937	0.0555556		616	26385	0.0428682		662.5	23342	0.042413		621.1	11983	0.0200293
	625.1	16817	0.0852171		616.12	27387	0.0934633		622.1	7787	0.0320151		618	26564	0.048629		664.6	22981	0.0215532		623.1	12051	0.0276809
	627.1	16681	0.0746524		618.12	27001	0.0795233		624.1	7898	0.049435		620	25782	0.0234616		666.8	23318	0.0410262		625.1	12043	0.0267807
	629.1	16598	0.0682048		620.12	27435	0.0951968		626.1	7937	0.0555556		622	26354	0.0418705		668.9	23080	0.0272738		627.1	11862	0.00641386
	631	16436	0.0556203		622.12	25955	0.0417479		628.1	7878	0.0462963		624	26815	0.056707		671.1	23058	0.0260025		629.1	11992	0.021042
	633.1	16488	0.0596598		624.12	26782	0.0716143		630.1	7810	0.0356246		626	26997	0.0625644		673.2	23206	0.0345545		631.1	12055	0.028131
	635	16662	0.0731764		626.12	26565	0.0637775		632.1	8127	0.0853735		628	27214	0.0695481		675.4	23281	0.0388882		633.1	12093	0.0324069
	637.1	16486	0.0595044		628.12	26755	0.0706392		634.1	7774	0.0299749		630	27485	0.0782698		677.6	23368	0.0439154		635.1	11938	0.0149657
	639.1	16575	0.0664181		630.12	26206	0.0508126		636.1	7894	0.0488073		632	27398	0.0754699		679.7	23022	0.0239223		637.1	12143	0.0380331
	641.1	16406	0.0532898		632.12	27300	0.0903214		638.1	7947	0.0571249		634	26502	0.0466336		681.9	23290	0.0394083		639.1	11947	0.0159784
	643.1	16674	0.0741086		634.12	26098	0.0469122		640.1	7941	0.0561833		636	26499	0.0465371		684	23096	0.0281983		641.1	12176	0.0417464
	645	16589	0.0675056		636.12	27368	0.0927772		642.1	7936	0.0553986		638	26478	0.0458612		686.2	23362	0.0435687		643.1	12135	0.0371329
	647.1	16381	0.0513478		638.12	27512	0.0979776		644.1	7845	0.0411174		640	27607	0.0821962		688.4	23348	0.0427597		645.1	11813	0.000900191
	649	16642	0.0716228		640.12	27270	0.089238		646.1	7935	0.0552417		642	25899	0.0272271		690.5	23283	0.0390038		647.1	11961	0.0175537
	651	16730	0.0784588		642.12	25656	0.0309498		648.1	7900	0.0497489		644	26137	0.0348867		692.7	23165	0.0321854		649.1	11903	0.0110273
	653.1	16642	0.0716228		644.12	27739	0.106176		650.1	7897	0.0492781		646	27066	0.064785		694.8	23119	0.0295273		651.1	12143	0.0380331
	655	16731	0.0785365		646.12	26478	0.0606356		652.1	7897	0.0492781		648	27036	0.0638195		696.9	23497	0.0513695		653.1	11992	0.021042
	657.1	16718	0.0775266		648.12	26166	0.049368		654.1	7927	0.0539862		650	26731	0.0540036		699.1	23074	0.0269271		655.1	12010	0.0230674
	659.1	16734	0.0787695		650.12	26143	0.0485374		656.1	7853	0.0423729		652	26881	0.0588311		701.3	23119	0.0295273		657.1	12056	0.0282435
	661.1	16682	0.0747301		652.12	27286	0.0898158		658.1	7907	0.0508475		654	26306	0.0403257		703.4	23092	0.0279672		659.1	11915	0.0123776
	663.1	16440	0.055931		654.12	26662	0.0672806		660.1	7827	0.0382925		656	26432	0.0443808		705.5	22989	0.0220155		661.1	12093	0.0324069
	665.1	16412	0.0537559		656.12	26781	0.0715782		662.1	7976	0.0616761		658	26256	0.0387165		707.7	23123	0.0297585		663.1	11992	0.021042
	667.1	16292	0.0444341		658.12	26517	0.0620441		664.1	7784	0.0315443		660	27137	0.06707		709.9	23257	0.0375014		665.1	11885	0.00900191
	669.1	16482	0.0591937		660.12	26009	0.0436981		666.1	7875	0.0458255		662	27098	0.0658149		712	22918	0.0179129		667.1	11932	0.0142905
	671.1	16467	0.0580284		662.12	26908	0.0761647		668.1	8040	0.07172		664	26955	0.0612127		714.2	23210	0.0347856		669.1	11830	0.0028131
	673.1	16810	0.0846733		664.12	26755	0.0706392		670.1	7878	0.0462963		666	26981	0.0620494		716.4	23085	0.0275627		671.1	11980	0.0196917
	675.1	16522	0.0623009		666.12	26129	0.0480318		672.1	7857	0.0430006		668	26634	0.0508818		718.5	23040	0.0249624		673.1	12013	0.023405
	677.1	16651	0.0723219		668.12	26929	0.0769231		674.1	7858	0.0431576		670	26202	0.0369786		720.7	22818	0.0121345		675.1	11981	0.0198042
	679.1	16362	0.0498718		670.12	26579	0.0642831		676.1	7891	0.0483365		672	26029	0.0314109		722.8	22957	0.0201664		677.1	12043	0.0267807
	681.1	16714	0.0772159		672.12	25837	0.0374865		678.1	7771	0.0295041		674	26431	0.0443486		725	23062	0.0262337		679.1	11956	0.0169911
	683.1	16467	0.0580284		674.12	26298	0.0541351		680.1	7820	0.037194		676	26660	0.0517186		727.1	23249	0.0370392		681.1	11897	0.0103522
	685.1	16484	0.059349		676.12	27063	0.0817624		682.1	7648	0.0102009		678	26277	0.0393924		729.3	23017	0.0236334		683.1	11786	-0.00213795
	687.1	16652	0.0723996		678.12	26337	0.0555435		684.1	7808	0.0353107		680	26140	0.0349833		731.5	23020	0.0238068		685.1	12024	0.0246427
	689.1	16554	0.0647868		680.12	26121	0.0477429		686.1	7833	0.0392341		682	26172	0.0360131		733.6	23230	0.0359413		687.1	11953	0.0166535
	691.1	16409	0.0535229		682.12	26461	0.0600217		688.1	7717	0.0210295		684	27016	0.0631758		735.7	23067	0.0265226		689.1	12069	0.0297063
	693.1	16186	0.0361998		684.12	27466	0.0963164		690.1	7974	0.0613622		686	26111	0.0340499		737.9	23011	0.0232867		691.1	11970	0.0185664
	695.1	16409	0.0535229		686.12	26209	0.0509209		692.1	7805	0.0348399		688	26288	0.0397464		740	23197	0.0340344		693.1	11999	0.0218296
	697.1	16457	0.0572516		688.12	26328	0.0552185		694.1	7878	0.0462963		690	26845	0.0576725		742.2	23259	0.037617		695.1	12078	0.030719
	699.1	16311	0.04591		690.12	26845	0.0738895		696.1	7891	0.0483365		692	26266	0.0390384		744.4	22816	0.012019		697.1	12118	0.03522
	701.1	16546	0.0641653		692.12	27140	0.0845432		698.1	7786	0.0318581		694	26789	0.0558702		746.5	23080	0.0272738		699.1	11848	0.00483853
	703.1	16334	0.0476967		694.12	26007	0.0436259		700.1	7920	0.0528876		696	26851	0.0578656		748.7	23235	0.0362302		701.1	11850	0.00506358
	705.1	16332	0.0475414		696.12	26556	0.0634525		702.1	7820	0.037194		698	26530	0.0475348		750.8	22726	0.00681844		703.1	12016	0.0237425
	707.1	16590	0.0675833		698.12	27257	0.0887685		704.1	7998	0.0651287		700	26005	0.0306385		753	22959	0.020282		705.1	11742	-0.00708901
	709.1	16347	0.0487066		700.12	26344	0.0557963		706.1	7888	0.0478657		702	26210	0.0372361		755.1	23105	0.0287184		707.1	11987	0.0204794
	711.1	16285	0.0438903		702.12	25925	0.0406645		708.1	7854	0.0425298		704	26772	0.0553231		757.3	23334	0.0419508		709.1	11975	0.0191291
	713.1	16591	0.067661		704.12	26644	0.0666306		710.6	7722	0.0218142		706	27271	0.0713826		759.5	23103	0.0286028		711.1	11942	0.0154158
	715.1	16514	0.0616795		706.12	26280	0.053485		714.1	7860	0.0434714		708	26049	0.0320546		761.7	23121	0.0296429		713.1	11829	0.00270057
	717.1	16464	0.0577954		708.12	26655	0.0670278		715.9	7831	0.0389203		710	26078	0.0329879		763.8	23136	0.0305096		715.1	11893	0.0099021
	719.1	16584	0.0671172		710.12	27000	0.0794872		717.8	7745	0.0254237		712	26246	0.0383947		766	23158	0.0317809		717.1	11965	0.0180038
	721.1	16225	0.0392294		712.12	26304	0.0543518		719.6	7789	0.0323289		714	26486	0.0461187		768.2	23175	0.0327632		719.1	11924	0.0133903
	723.1	16375	0.0508817		714.12	26064	0.0456844		721.4	7760	0.0277778		716	26729	0.0539392		770.3	22929	0.0185485		721.1	11794	-0.00123776
	725.1	16347	0.0487066		716.12	26312	0.0546407		723.2	7693	0.017263		718	25592	0.0173468		772.4	22864	0.0147926		723.1	12021	0.0243052
	727.1	16442	0.0560864		718.12	25998	0.0433008		725	7724	0.0221281		720	25623	0.0183445		774.6	23206	0.0345545		725.1	11949	0.0162034
	729.1	16303	0.0452886		720.12	26733	0.0698447		726.7	7880	0.0466102		722	26632	0.0508175		776.8	23117	0.0294118		727.1	11952	0.016541
	731.1	16337	0.0479298		722.12	25840	0.0375948		728.5	7912	0.0516321		724	26909	0.0597322		779	22857	0.0143881		729.1	11936	0.0147406
	733.1	16344	0.0484735		724.12	26225	0.0514987		730.3	7829	0.0386064		726	25996	0.0303489		781.1	22906	0.0172195		731.1	12003	0.0222797
	735.1	16398	0.0526684		726.12	27032	0.0806428		732.1	7872	0.0453547		728	26921	0.0601184		783.3	23046	0.0253091		733.1	12016	0.0237425
	737.1	16516	0.0618348		728.12	26886	0.0753702		734.1	7721	0.0216573		730	26394	0.0431578		785.4	22986	0.0218421		735.1	11999	0.0218296
	739.1	16238	0.0402393		730.12	26458	0.0599133		736.1	7792	0.0327997		732	26292	0.0398751		787.6	23120	0.0295851		737.1	11962	0.0176663
	741.1	16528	0.062767		732.12	25660	0.0310943		738.1	7963	0.0596359		734	25376	0.0103952		789.8	23030	0.0243846		739.1	12024	0.0246427
	743.1	16423	0.0546104		734.12	27949	0.113759		740.1	7867	0.04457		736	25878	0.0265512		791.9	23083	0.0274471		741.1	11853	0.00540115
	745.1	16526	0.0626117		736.12	26841	0.073745		742.1	7695	0.0175769		738	26316	0.0406475		794	22765	0.009072		743.1	11872	0.0075391
	747.1	16245	0.040783		738.12	26477	0.0605995		744.1	7894	0.0488073		740	26856	0.0580265		796.2	23085	0.0275627		745.1	11884	0.00888939
	749.1	16306	0.0455216		740.12	26411	0.058216		746.1	7826	0.0381356		742	25628	0.0185054		798.3	23189	0.0335722		747.1	12006	0.0226173
	751.1	16273	0.0429581		742.12	27266	0.0890935		748.1	7742	0.0249529		744	25784	0.023526		800.5	22937	0.0190107		749.1	12008	0.0228424
	753.1	16428	0.0549988		744.12	26875	0.0749729		750.1	7668	0.0133396		746	26019	0.0310891		802.7	23079	0.027216		751.1	11755	-0.0056262
	755.1	16356	0.0494057		746.12	26148	0.0487179		752.1	7812	0.0359385		748	27898	0.0915615		804.8	22827	0.0126546		753.1	12005	0.0225048
	757.1	16511	0.0614464		748.12	26113	0.047454		754.1	7894	0.0488073		750	26688	0.0526197		807	23110	0.0290073		755.1	11889	0.00945201
	759.1	16371	0.050571		750.12	25870	0.0386782		756.1	7859	0.0433145		752	26795	0.0560633		809.2	23074	0.0269271		757.1	12033	0.0256555
	761.1	16379	0.0511924		752.12	25693	0.032286		758.1	7684	0.0158506		754	26036	0.0316362		811.4	23072	0.0268115		759.1	11852	0.00528862
	763.1	16423	0.0546104		754.12	26418	0.0584688		760.1	7803	0.0345261		756	25482	0.0138066		813.5	22895	0.0165838		761.1	11885	0.00900191
	765.1	16276	0.0431912		756.12	26819	0.0729505		762.1	7852	0.0422159		758	25683	0.0202755		815.7	22871	0.015197		763.1	11985	0.0202543
	767.1	16496	0.0602812		758.12	25808	0.0364391		764.1	7728	0.0227558		760	25641	0.0189238		817.9	23065	0.026407		765.1	11843	0.00427591
	769.1	16476	0.0587276		760.12	26422	0.0586132		766.1	7827	0.0382925		762	26838	0.0574472		820.1	22977	0.0213221		767.1	11952	0.016541
	771.1	16291	0.0443564		762.12	26406	0.0580354		768.1	7751	0.0263653		764	26224	0.0376867		822.2	23104	0.0286606		769.1	11946	0.0158659
	773.1	16397	0.0525907		764.12	25346	0.0197544		770.1	7685	0.0160075		766	26213	0.0373326		824.4	23216	0.0351323		771.1	11786	-0.00213795
	775.1	16319	0.0465315		766.12	25684	0.031961		772.1	7883	0.047081		768	26848	0.0577691		826.6	23222	0.035479		773.1	12011	0.0231799
	777.1	16377	0.0510371		768.12	26001	0.0434092		774.1	7819	0.037037		770	26705	0.0531668		828.8	22994	0.0223044		775.1	12041	0.0265556
	779.1	16391	0.0521246		770.12	25360	0.02026		776.1	7701	0.0185185		772	25918	0.0278386		831	22823	0.0124234		777.1	11879	0.00832677
	781.1	16140	0.0326264		772.12	25865	0.0384977		778.1	7737	0.0241682		774	26457	0.0451854		833.1	22959	0.020282		779.1	12062	0.0289186
	783.1	16392	0.0522023		774.12	25738	0.0339112		780.1	7733	0.0235405		776	25696	0.0206939		835.3	22799	0.0110366		781.1	11928	0.0138404
	785.1	16435	0.0555426		776.12	26941	0.0773564		782.1	7701	0.0185185		778	26234	0.0380085		837.4	22901	0.0169305		783.1	12004	0.0223923
	787.1	16218	0.0386856		778.12	26297	0.054099		784.1	7846	0.0412743		780	26464	0.0454107		839.6	22907	0.0172772		785.1	12040	0.0264431
	789.1	16112	0.0304513		780.12	25516	0.0258938		786.1	7831	0.0389203		782	26121	0.0343718		841.7	23021	0.0238646		787.1	12060	0.0286936
	791.1	16268	0.0425697		782.12	25968	0.0422174		788.4	7811	0.0357815		784	26734	0.0541002		843.9	22923	0.0182018		789.1	12089	0.0319568
	793.1	16481	0.059116		784.12	27003	0.0795955		790.2	7660	0.0120841		786	27561	0.0807158		846	22876	0.015486		791.1	11994	0.021267
	795.1	16158	0.0340247		786.12	26319	0.0548935		792.1	7881	0.0467671		788	25227	0.0055999		848.2	22893	0.0164683		793.1	11903	0.0110273
	797.1	16390	0.0520469		788.12	26400	0.0578187		794.2	7767	0.0288763		790	25480	0.0137423		850.3	22871	0.015197		795.1	11983	0.0200293
	799.1	16470	0.0582615		790.12	25898	0.0396894		796.1	7744	0.0252668		792	25944	0.0286753		852.5	23100	0.0284294		797.1	11928	0.0138404
	801.1	16212	0.0382195		792.12	25122	0.0116649		798.1	7786	0.0318581		794	24886	-0.00537461		854.7	22990	0.0220733		799.1	11779	-0.00292562
	803.1	15984	0.020508		794.12	26769	0.0711448		800.1	7752	0.0265223		796	26493	0.046344		856.8	22766	0.00912978		801.1	11879	0.00832677
	805.1	16260	0.0419483		796.12	25751	0.0343806		802.1	7935	0.0552417		798	26696	0.0528772		859	22643	0.00202242		803.1	11883	0.00877687
	807.1	16417	0.0541443		798.12	25721	0.0332972		804.1	7869	0.0448839		800	25433	0.0122297		861.2	23205	0.0344967		805.1	12092	0.0322944
	809.1	16340	0.0481628		800.12	25543	0.0268689		806.1	7626	0.00674827		802	26101	0.0337281		863.4	22780	0.00993875		807.1	11923	0.0132778
	811.1	16537	0.0634662		802.12	25191	0.0141567		808.1	7779	0.0307596		804	26105	0.0338568		865.5	22931	0.018664		809.1	11909	0.0117025
	813.1	16216	0.0385303		804.12	26510	0.0617913		810.1	7779	0.0307596		806	26137	0.0348867		867.7	22977	0.0213221		811.1	11840	0.00393834
	815.1	16105	0.0299076		806.12	26362	0.0564464		812.1	7843	0.0408035		808	26371	0.0424176		869.9	22956	0.0201086		813.1	11855	0.0056262
	817.1	16255	0.0415599		808.12	25873	0.0387866		814.1	7604	0.00329567		810	26011	0.0308316		872	22759	0.0087253		815.1	11869	0.00720153
	819.1	16215	0.0384526		810.12	25955	0.0417479		816.1	7801	0.0342122		812	26318	0.0407119		874.2	22816	0.012019		817.1	11926	0.0136154
	821.1	16276	0.0431912		812.12	25600	0.0289274		818.1	7808	0.0353107		814	26562	0.0485646		876.4	22761	0.00884086		819.1	11956	0.0169911
	823.1	16134	0.0321603		814.12	26600	0.0650415		820.1	7895	0.0489642		816	26521	0.0472451		878.6	22942	0.0192997		821.1	11994	0.021267
	825.1	16191	0.0365882		816.12	25765	0.0348862		822.1	7621	0.00596359		818	25596	0.0174755		880.7	22851	0.0140414		823.1	11935	0.0146281
	827.1	16282	0.0436573		818.12	25788	0.0357169		824.1	7815	0.0364093		820	26561	0.0485324		882.9	23047	0.0253669		825.1	11857	0.00585124
	829.1	16131	0.0319273		820.12	24961	0.00585049		826.4	7659	0.0119272		822	26018	0.0310569		885.1	23059	0.0260603		827.1	12058	0.0284685
	831.1	16177	0.0355007		822.12	25422	0.0224991		828.2	7847	0.0414313		824	25794	0.0238478		887.3	23097	0.0282561		829.1	11926	0.0136154
	833.1	16154	0.033714		824.12	25524	0.0261827		830.1	7682	0.0155367		826	26198	0.0368499		889.5	22817	0.0120767		831.1	12007	0.0227298
	835.1	16086	0.0284316		826.12	26385	0.057277		832.1	7742	0.0249529		828	25292	0.00769181		891.6	23125	0.029874		833.1	11900	0.0106898
	837.1	16218	0.0386856		828.12	26457	0.0598772		834.1	7717	0.0210295		830	26551	0.0482106		893.8	22535	-0.00421819		835.1	11746	-0.00663891
	839.1	16320	0.0466092		830.12	26014	0.0438787		836.1	7817	0.0367232		832	25189	0.00437693		896	22794	0.0107477		837.1	12003	0.0222797
	841.1	16329	0.0473083		832.12	25819	0.0368364		838.1	7751	0.0263653		834	26143	0.0350798		898.2	23157	0.0317231		839.1	11979	0.0195792
	843.1	16302	0.0452109		834.12	26326	0.0551463		840.1	7758	0.0274639		836	25584	0.0170893		900.3	22915	0.0177395		841.1	12054	0.0280185
	845.1	16060	0.0264119		836.12	25755	0.0345251		842.1	7706	0.0193032		838	26071	0.0327626		902.5	23067	0.0265226		843.1	11978	0.0194666
	847.1	16259	0.0418706		838.12	26165	0.0493319		844.1	7750	0.0262084		840	25845	0.0254892		904.7	22827	0.0126546		845.1	11912	0.0120401
	849.1	16310	0.0458324		840.12	26018	0.0440231		846.2	7864	0.0440992		842	25652	0.0192778		906.9	22882	0.0158327		847.1	11912	0.0120401
	851.1	16050	0.0256351		842.12	25037	0.00859516		848.1	7807	0.0351538		844	25040	-0.000418383		909	22959	0.020282		849.1	12086	0.0316192
	853.1	16328	0.0472306		844.12	25541	0.0267967		850.1	7732	0.0233836		846	25005	-0.0015448		911.2	22737	0.00745406		851.1	11824	0.00213795
	855.1	16224	0.0391517		846.12	26111	0.0473817		852.1	7789	0.0323289		848	25696	0.0206939		913.3	23001	0.0227089		853.1	12058	0.0284685
	857.1	16219	0.0387633		848.12	26412	0.0582521		854.1	7806	0.0349969		850	25200	0.00473095		915.5	22962	0.0204553		855.1	12092	0.0322944
	859.1	16368	0.0503379		850.12	25622	0.0297219		856.1	7558	-0.00392341		852	25797	0.0239444		917.7	22907	0.0172772		857.1	11858	0.00596377
	861.1	15987	0.0207411		852.12	26001	0.0434092		858.1	7610	0.00423729		854	26180	0.0362706		919.8	23167	0.0323009		859.1	11744	-0.00686396
	863.1	16210	0.0380642		854.12	25059	0.00938967		860.1	7733	0.0235405		856	25653	0.01931		922	22797	0.0109211		861.1	12077	0.0306065
	865.1	16174	0.0352676		856.12	25797	0.0360419		862.1	7669	0.0134965		858	26162	0.0356913		924.2	23133	0.0303363		863.1	11953	0.0166535
	867.1	16108	0.0301406		858.12	26071	0.0459372		864.1	7710	0.0199309		860	25213	0.00514933		926.3	22797	0.0109211		865.1	11865	0.00675143
	869.1	16100	0.0295191		860.12	26658	0.0671362		866.8	7739	0.0244821		862	26240	0.0382016		928.4	23030	0.0243846		867.1	11844	0.00438843
	871.1	15991	0.0210518		862.12	25560	0.0274828		868.6	7636	0.00831764		864	25789	0.0236869		930.6	23041	0.0250202		869.1	12014	0.0235175
	873.1	16154	0.033714		864.12	26411	0.058216		870.4	7789	0.0323289		866	25335	0.0090757		932.8	22954	0.0199931		871.1	11729	-0.00855182
	875.1	16220	0.038841		866.12	26699	0.0686168		872.2	7752	0.0265223		868	25161	0.0034758		934.9	22768	0.00924535		873.1	11937	0.0148532
	877.1	16061	0.0264896		868.12	26405	0.0579993		874.1	7621	0.00596359		870	26456	0.0451532		937.1	22852	0.0140992		875.1	11852	0.00528862
	879.1	16291	0.0443564		870.12	25686	0.0320332		876.1	7708	0.0196171		872	25334	0.00904351		939.3	22590	-0.0010401		877.1	11990	0.0208169
	881.1	16247	0.0409384		872.12	25063	0.00953413		878.1	7743	0.0251099		874	25680	0.0201789		941.4	22584	-0.0013868		879.1	11681	-0.013953
	883.1	16197	0.0370543		874.12	25547	0.0270134		880.1	7589	0.00094162		876	26160	0.0356269		943.6	23004	0.0228822		881.1	11840	0.00393834
	885.1	16221	0.0389187		876.12	25238	0.0158541		882.1	7740	0.024639		878	24970	-0.00267122		945.7	22800	0.0110944		883.1	11794	-0.00123776
	887.1	15975	0.0198089		878.12	25201	0.0145179		884.1	7695	0.0175769		880	26250	0.0385234		947.9	23025	0.0240957		885.1	11898	0.0104647
	889.1	16272	0.0428804		880.12	25120	0.0115926		886.4	7636	0.00831764		882	26373	0.042482		950	22998	0.0225355		887.1	11988	0.0205919
	891.1	16078	0.0278101		882.12	26988	0.0790538		888.3	7690	0.0167922		884	24841	-0.00682286		952.2	22756	0.00855195		889.1	11944	0.0156408
	893.1	16054	0.0259458		884.12	25496	0.0251715		890.1	7609	0.00408035		886	25800	0.0240409		954.3	22759	0.0087253		891.1	11847	0.004726
	895.1	16084	0.0282762		886.12	25404	0.021849		892.1	7603	0.00313873		888	25893	0.027034		956.5	22796	0.0108633		893.1	11960	0.0174412
	897.1	16156	0.0338693		888.12	25835	0.0374142		894.2	7636	0.00831764		890	25676	0.0200502		958.6	22758	0.00866751		895.1	11796	-0.00101272
	899.1	15976	0.0198866		890.12	26499	0.061394		896.1	7599	0.00251099		892	25319	0.00856076		960.8	23069	0.0266382		897.1	12001	0.0220547
	901.1	15994	0.0212849		892.12	25627	0.0299025		898.1	7624	0.0064344		894	26205	0.0370752		963	23095	0.0281405		899.1	11867	0.00697648
	903.1	16009	0.0224501		894.12	26475	0.0605273		900.1	7762	0.0280917		896	26038	0.0317006		965.2	23018	0.0236912		901.1	11969	0.0184539
	905.1	16245	0.040783		896.12	24955	0.0056338		902.1	7693	0.017263		898	25642	0.018956		967.4	22813	0.0118456		903.1	11869	0.00720153
	907.1	16268	0.0425697		898.12	25889	0.0393644		904.1	7659	0.0119272		900	24903	-0.0048275		969.5	22903	0.0170461		905.1	11760	-0.00506358
	909.1	16005	0.0221394		900.12	25666	0.0313109		906.2	7623	0.00627746		902	25460	0.0130986		971.7	22761	0.00884086		907.1	11995	0.0213795
	911.1	16068	0.0270333		902.12	25186	0.0139762		908.1	7641	0.00910232		904	25835	0.0251674		973.9	23031	0.0244424		909.1	11969	0.0184539
	913.1	16157	0.033947		904.12	25716	0.0331166		910.1	7625	0.00659134		906	25945	0.0287075		976.1	22873	0.0153126		911.1	12070	0.0298188
	915.1	16135	0.032238		906.12	25846	0.0378115		912.1	7703	0.0188324		908	24118	-0.0300914		978.2	22676	0.00392927		913.1	11800	-0.00056262
	917.1	16135	0.032238		908.12	25111	0.0112676		914.1	7639	0.00878845		910	25529	0.0153193						915.1	11919	0.0128277
	919.1	16237	0.0401616		910.12	25982	0.042723		916.1	7462	-0.0189893		912	26143	0.0350798						917.1	11685	-0.0135029
	921.1	16255	0.0415599		912.12	26376	0.056952		918.1	7596	0.00204018		914	25335	0.0090757						919.1	11822	0.00191291
	923.1	16040	0.0248582		914.12	26713	0.0691224		920.1	7638	0.00863151		916	26096	0.0335672						921.3	11893	0.0099021
	925.1	16266	0.0424144		916.12	26135	0.0482485		922.1	7741	0.024796		918	25220	0.00537461						923.1	11685	-0.0135029
	927.1	16175	0.0353453		918.12	24860	0.00220296		924.1	7593	0.00156937		920	25467	0.0133239						925.1	11887	0.00922696
	929.1	15955	0.0182553		920.12	25558	0.0274106		926.1	7720	0.0215003		922	26557	0.0484037						927.1	12062	0.0289186
	931.1	16138	0.0324711		922.12	25596	0.028783		928.1	7692	0.0171061		924	25750	0.0224318						929.3	11841	0.00405086
	933.1	16104	0.0298299		924.12	25950	0.0415674		930.1	7683	0.0156937		926	25706	0.0210157						931.1	11764	-0.00461348
	935.1	16111	0.0303737		926.12	25374	0.0207656		932.1	7665	0.0128688		928	25199	0.00469876						933.1	11783	-0.00247553
	937.1	16086	0.0284316		928.12	24778	-0.000758397		934.1	7642	0.00925926		930	25777	0.0233007						935.1	11807	0.000225048
	939.1	16216	0.0385303		930.12	24614	-0.00668111		936.1	7517	-0.0103578		932	25855	0.025811						937.1	11885	0.00900191
	941.1	16115	0.0306844		932.12	25781	0.0354641		938.1	7746	0.0255807		934	26487	0.0461509						939.1	11839	0.00382581
	943.1	16213	0.0382972		934.12	26139	0.0483929		940.1	7617	0.00533584		936	25972	0.0295765						941.1	12003	0.0222797
	945.1	16134	0.0321603		936.12	25170	0.0133983		942.1	7643	0.0094162		938	26159	0.0355947						943.1	11902	0.0109148
	947.1	16016	0.0229939		938.12	25069	0.00975081		944.1	7748	0.0258945		940	24763	-0.00933316						945.1	11865	0.00675143
	949.1	15894	0.0135167		940.12	25732	0.0336945		946.1	7607	0.00376648		942	25750	0.0224318						947.1	11817	0.00135029
	951.1	16076	0.0276548		942.12	24415	-0.0138678		948.1	7647	0.0100439		944	25099	0.00148043						949.1	11720	-0.00956453
	953.1	16062	0.0265672		944.12	24972	0.00624774		950.1	7729	0.0229127		946	26118	0.0342752						951.1	11794	-0.00123776
	955.1	16003	0.021984		946.12	24886	0.00314193		952.1	7658	0.0117702		948	25804	0.0241697						953.1	11888	0.00933948
	957.1	16365	0.0501049		948.12	24733	-0.00238353		954.1	7746	0.0255807		950	25990	0.0301558						955.1	11934	0.0145156
	959.1	15791	0.00551542		950.12	25481	0.0246298		956.1	7633	0.00784683		952	25339	0.00920443						957.1	11773	-0.00360077
	961.1	15891	0.0132836		952.12	25042	0.00877573		958.1	7662	0.012398		954	25165	0.00360453						959.1	11990	0.0208169
	963.1	15961	0.0187214		954.12	24615	-0.006645		960.1	7637	0.00847458		956	24517	-0.0172503						961.1	11763	-0.004726
	965.1	16067	0.0269556		956.12	25395	0.021524		962.1	7606	0.00360954		958	26175	0.0361097						963.1	11959	0.0173287
	967.1	16071	0.0272664		958.12	26251	0.0524377		964.1	7727	0.0225989		960	26101	0.0337281						965.1	11902	0.0109148
	969.1	15924	0.0158471		960.12	25619	0.0296136		966.1	7696	0.0177338		962	25710	0.0211444						967.1	11828	0.00258805
	971.1	16029	0.0240037		962.12	24512	-0.0103648		968.1	7779	0.0307596		964	25644	0.0190203						969.1	11830	0.0028131
	973.1	16014	0.0228385		964.12	24740	-0.00213073		970.1	7626	0.00674827		966	25807	0.0242662						971.1	11837	0.00360077
	975.1	16289	0.044201		966.12	25577	0.0280968		972.1	7671	0.0138104		968	25443	0.0125515						973.1	12008	0.0228424
	977.1	15980	0.0201973		968.12	24401	-0.0143734		974.1	7738	0.0243252		970	24757	-0.00952626						975.1	11885	0.00900191
	979.1	16160	0.0341801		970.12	25730	0.0336222		976.1	7727	0.0225989		972	25664	0.019664						977.1	12003	0.0222797
	981.1	16151	0.0334809		972.12	25759	0.0346696		978.1	7648	0.0102009		974	24761	-0.00939753						979.1	11756	-0.00551367
