# Supplementary material for: Hypertrophic cardiomyopathy mutations in the pliant and light chain-binding regions of the lever arm of human β-cardiac myosin have divergent effects on myosin function
Source: eLife. 2022 Jun 29;11:e76805. doi: 10.7554/eLife.76805 (PMC9242648; doi:10.7554/eLife.76805)
Supplement: Figure 7—figure supplement 2—source data 1. — Each row represents an individual technical replicate, where rows are matched by replicate across the three data groups. [file elife-76805-fig7-figsupp2-data1.xlsx]

## Sheet: Fig 7 - figure supplement 2
	Fig. 7 - fig supp 2: 2-hep STO results (% slow, all measurements)							2-hep STO results (fast rates, all measurements)							2-hep STO results (slow rates, all measurements)
	WT	D778V	L781P	S782N	A797T	F834L		WT	D778V	L781P	S782N	A797T	F834L		WT	D778V	L781P	S782N	A797T	F834L
	22.94	17.73	26.66	20.15	17.41	19.97		0.01074	0.01428	0.01148	0.01741	0.01309	0.01303		0.001261	0.001818	0.00168	0.00198	0.001947	0.000677
	23.91	14.21	23.63	21.08	17.06	25.16		0.01296	0.01449	0.01119	0.01619	0.01317	0.01578		0.002882	0.00325	0.0009623	0.003416	0.00141	0.002451
	24.18	36.08	21.28	18.75	18.33	31.43		0.01187	0.01829	0.01149	0.01496	0.01441	0.01557		0.003223	0.006966	0.0004521	0.001952	0.001565	0.002713
	20.38	20.92	20.33	18.12	18.3	29.21		0.01065	0.01622	0.01097	0.01422	0.01286	0.01664		0.001246	0.006434	0.0006547	0.00159	0.002446	0.004287
	11.11	15.84	21.52	30.38				0.01473	0.01285	0.01469	0.01842				0.002112	0.003141	0.001984	0.004059
	20.6	17.75	25.11	17.12				0.01418	0.01417	0.01631	0.01739				0.000356	0.00326	0.002886	0.003455
	16.64	9.29	23.51	21.03				0.01526	0.01131	0.01864	0.01579				0.00172	0.002742	0.003088	0.004158
	28.97	7.54						0.01224	0.0121						0.000607	0.00135
	22.56	7.03						0.01365	0.01247						0.001494	0.00222
	17.75							0.01536							0.002625
