# Supplementary material for: Hypertrophic cardiomyopathy mutations in the pliant and light chain-binding regions of the lever arm of human β-cardiac myosin have divergent effects on myosin function
Source: eLife. 2022 Jun 29;11:e76805. doi: 10.7554/eLife.76805 (PMC9242648; doi:10.7554/eLife.76805)
Supplement: Figure 7—source data 1. — Each row represents an individual technical replicate, where rows are matched by replicate across the three data groups. [file elife-76805-fig7-data1.xlsx]

## Sheet: Fig 7
	Fig. 7G: 25-hep STO results (% slow, all measurements)							25-hep STO results (fast rates, all measurement)							25-hep STO results (slow rates, all measurement)
	WT	D778V	L781P	S782N	A797T	F834L		WT	D778V	L781P	S782N	A797T	F834L		WT	D778V	L781P	S782N	A797T	F834L
	57.23	69.77	58.49	68.9	26.07	17.99		0.04757	0.02167	0.01487	0.007764	0.01086	0.01427		0.002987	0.003599	0.003638	0.002649	0.001771	0.003589
	52.88	58.25	56.93	72.09	22.9	15.31		0.01364	0.02061	0.01439	0.008079	0.0116	0.0135		0.002789	0.003344	0.003683	0.001766	0.002258	0.003055
	64.16	65.67	54.48	76.92	29.8	17.7		0.01381	0.07459	0.01196	0.01412	0.01241	0.01277		0.003464	0.003508	0.003598	0.00368	0.002798	0.001158
	57.97	44.31	69.73	68.01	28.33	8.37		0.01598	0.00901	0.01191	0.01388	0.01174	0.01268		0.003172	0.002665	0.004111	0.00331	0.001839	0.002066
	44.85	65.45	44.75	67.99	25.26	15.17		0.009216	0.01178	0.01119	0.01262	0.01021	0.01337		0.003008	0.00344	0.003073	0.0039	0.002362	0.002489
	40.43	77.89	56.13	62.95	19.87	20.81		0.01111	0.01476	0.01449	0.02107	0.01027	0.01404		0.002191	0.003879	0.003838	0.003801	0.002688	0.003168
	74.17	68.9	76.72	60.91	35.9	18.71		0.02737	0.01103	0.02899	0.01494	0.01291	0.01367		0.004255	0.003849	0.006476	0.003729	0.004131	0.003374
	57.18	59.37	73.85	64.36	18.76			0.01515	0.01262	0.01518	0.01445	0.01043			0.003235	0.003104	0.003753	0.003387	0.002479
	64.89							0.01254							0.00335
